# Supplementary material
Source: Elsevier journal article supplement (https://comptes-rendus.academie-sciences.fr/chimie/article/10.1016/j.crci.2010.04.009/file/attach/mmc1.pdf)
Supplement: mmc1 [file mmc1.pdf]

# Phosphinidene generation from phosphorus heterocycles and cages – A theoretical study

by Zoltán Benkő <sup>a,\*</sup> Dietrich Gudat <sup>b,\*</sup> László Nyulászi <sup>a</sup>

a: Department of Inorganic and Analytical Chemistry, Budapest University of Technology and Economics, Szent Gellért tér 4, 1111 Budapest (Hungary)

Fax: (+36) 1463-36-42, E-mail: zbenko@mail.bme.hu, nyulaszi@mail.bme.hu

b: Institute of Inorganic Chemistry, University of Stuttgart, Pfaffenwaldring 55, 70550 Stuttgart (Germany)

Fax: (+49) 711-685-64241, E-mail: gudat@iac.uni-stuttgart.de

## Supplementary material

Relative energies of the isomers of complexes **1Pa-d**, **2Pa-d**, **3Pa-d**, **4Pa-d**, and **6Pa-d** at the B3LYP/6-311+G\*\*//B3LYP/6-311+G\*\* level of theory (in kcal mol<sup>-1</sup>):

### 1Pa-d

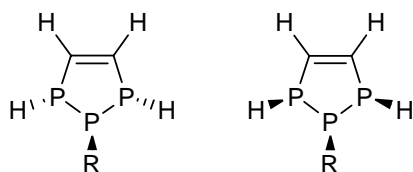

| R:                                               | Isomer 1 | Isomer 2 |
|--------------------------------------------------|----------|----------|
| H ( <b>a</b> )                                   | 0.0      | 5.5      |
| NH <sub>2</sub> ( <b>b</b> )                     | 0.0      | 1.7      |
| N=CH <sub>2</sub> ( <b>c</b> )                   | 0.0      | 4.7      |
| N=C(SiH <sub>3</sub> ) <sub>2</sub> ( <b>d</b> ) | 0.0      | 3.7      |

### 2Pa-d

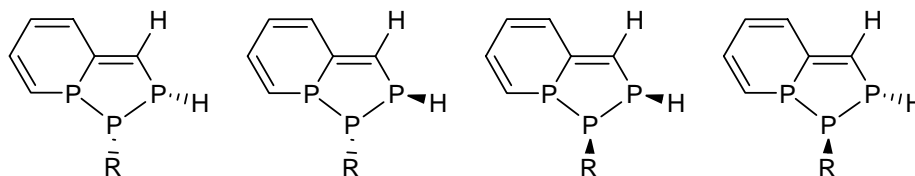

| R:                                               | Isomer 1 | Isomer 2 | Isomer 3 | Isomer 4 |
|--------------------------------------------------|----------|----------|----------|----------|
| H ( <b>a</b> )                                   | 2.0      | 0.3      | 1.4      | 0.0      |
| NH <sub>2</sub> ( <b>b</b> )                     | 0.0      | 0.3      | 0.8      | 0.6      |
| N=CH <sub>2</sub> ( <b>c</b> )                   | 0.4      | 0.3      | 0.0      | 0.2      |
| N=C(SiH <sub>3</sub> ) <sub>2</sub> ( <b>d</b> ) | 1.4      | 2.0      | 0.0      | 0.4      |

**3Pa-c**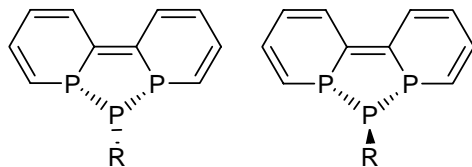

| R:                             | Isomer 1 | Isomer 2 |
|--------------------------------|----------|----------|
| H ( <b>a</b> )                 | 0.3      | 0.0      |
| NH <sub>2</sub> ( <b>b</b> )   | 0.0      | 0.7      |
| N=CH <sub>2</sub> ( <b>c</b> ) | 0.0      | 0.4      |

**4Pa-c**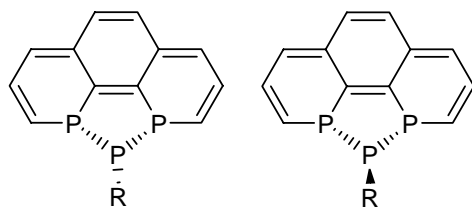

| R:                             | Isomer 1 | Isomer 2 |
|--------------------------------|----------|----------|
| H ( <b>a</b> )                 | 0.7      | 0.0      |
| NH <sub>2</sub> ( <b>b</b> )   | 0.4      | 0.0      |
| N=CH <sub>2</sub> ( <b>c</b> ) | 0.1      | 0.0      |

**6Pa-c**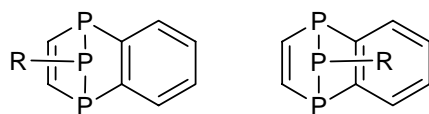

| R:                                               | Isomer 1 | Isomer 2 |
|--------------------------------------------------|----------|----------|
| H ( <b>a</b> )                                   | 0.5      | 0.0      |
| NH <sub>2</sub> ( <b>b</b> )                     | 1.6      | 0.0      |
| N=CH <sub>2</sub> ( <b>c</b> )                   | 1.2      | 0.0      |
| N=C(SiH <sub>3</sub> ) <sub>2</sub> ( <b>d</b> ) | 1.3      | 0.0      |

Optimised geometries (in angströms) and total energies (in hartrees) at the B3LYP/6-311+G\*\* level of theory.

**1Pa** (isomer 1,  $C_s$ )

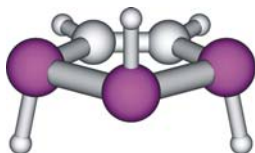

E=-1103.3575868

|   |           |           |           |
|---|-----------|-----------|-----------|
| P | 0.011332  | -1.469839 | 0.000000  |
| H | 1.424485  | -1.615352 | 0.000000  |
| P | 0.024796  | 0.008595  | 1.692470  |
| P | 0.024796  | 0.008595  | -1.692470 |
| C | 0.024796  | 1.538479  | 0.668052  |
| C | 0.024796  | 1.538479  | -0.668052 |
| H | -1.376039 | -0.008002 | 1.959948  |
| H | -1.376039 | -0.008002 | -1.959948 |
| H | 0.058088  | 2.479678  | 1.213906  |
| H | 0.058088  | 2.479678  | -1.213906 |

**1Pa** (isomer 2,  $C_s$ )

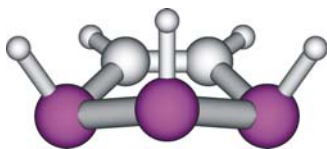

E=-1103.348865

|   |           |           |           |
|---|-----------|-----------|-----------|
| P | 0.677271  | -1.335225 | 0.000000  |
| H | 1.920482  | -0.636527 | 0.000000  |
| P | -0.307018 | -0.080414 | 1.617303  |
| P | -0.307018 | -0.080414 | -1.617303 |
| C | -0.307018 | 1.496374  | 0.668719  |
| C | -0.307018 | 1.496374  | -0.668719 |
| H | 0.861777  | 0.142680  | 2.399178  |
| H | 0.861777  | 0.142680  | -2.399178 |
| H | -0.454163 | 2.417741  | 1.227904  |
| H | -0.454163 | 2.417741  | -1.227904 |

### 1Pb (isomer 1)

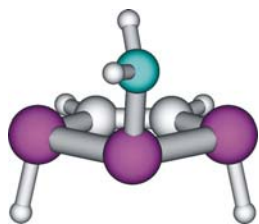

E=-1158.7386633

|   |           |           |           |
|---|-----------|-----------|-----------|
| C | -1.797822 | -0.603479 | 0.346190  |
| P | -0.364420 | -1.675492 | -0.076613 |
| P | 1.130385  | -0.044831 | -0.563619 |
| N | 2.139169  | 0.008892  | 0.829071  |
| C | -1.741117 | 0.732770  | 0.337821  |
| P | -0.225719 | 1.687000  | -0.083106 |
| H | -0.753123 | -1.964243 | -1.417553 |
| H | -0.587727 | 1.986554  | -1.429353 |
| H | -2.707741 | -1.108522 | 0.665677  |
| H | -2.606293 | 1.316202  | 0.648530  |
| H | 3.039164  | -0.434715 | 0.714288  |
| H | 1.771483  | -0.133420 | 1.760918  |

### 1Pb (isomer 2)

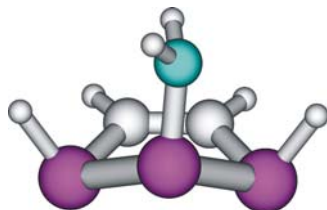

E=-1158.7358871

|   |           |           |           |
|---|-----------|-----------|-----------|
| C | -1.248482 | 1.150895  | 0.604067  |
| P | 0.154087  | 1.617230  | -0.487868 |
| P | 1.150886  | -0.416104 | -0.494415 |
| N | 1.768687  | -0.489447 | 1.107291  |
| C | -1.701267 | -0.110935 | 0.621414  |
| P | -0.926236 | -1.378091 | -0.456498 |
| H | 1.014106  | 2.192858  | 0.487936  |
| H | -0.629647 | -2.361852 | 0.530123  |
| H | -1.778565 | 1.945733  | 1.123652  |
| H | -2.606607 | -0.374283 | 1.163023  |
| H | 2.483502  | -1.185749 | 1.268934  |
| H | 1.153847  | -0.375858 | 1.904128  |

### 1Pc (isomer 1)

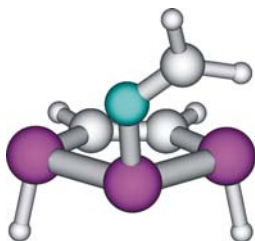

E=-1196.8213251

|   |           |           |           |
|---|-----------|-----------|-----------|
| C | 1.996583  | -0.131616 | -0.663950 |
| C | 1.622926  | 1.146720  | -0.552223 |
| P | 0.060296  | 1.680947  | 0.257149  |
| P | -0.669181 | -0.372456 | 0.868752  |
| P | 1.013117  | -1.554313 | -0.032841 |
| N | -1.860716 | -0.763997 | -0.331120 |
| H | 1.744527  | -1.719214 | 1.180801  |
| H | 0.612274  | 2.039686  | 1.520086  |
| H | 2.910632  | -0.384227 | -1.198815 |
| H | 2.227839  | 1.934016  | -0.998343 |
| C | -2.685516 | 0.047668  | -0.847877 |
| H | -3.454134 | -0.343682 | -1.516799 |
| H | -2.683571 | 1.132094  | -0.680695 |

### 1Pc (isomer 2)

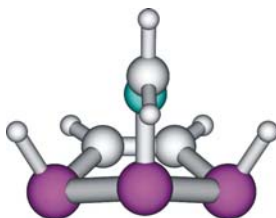

E=-1196.8137511

|   |           |           |           |
|---|-----------|-----------|-----------|
| C | 1.737231  | -0.667660 | 0.819732  |
| P | 0.742569  | -1.616728 | -0.398153 |
| P | -0.785573 | -0.000168 | -0.822867 |
| N | -1.647372 | -0.000238 | 0.740643  |
| C | -2.915405 | -0.000063 | 0.668756  |
| C | 1.737058  | 0.668087  | 0.819694  |
| P | 0.742145  | 1.616821  | -0.398248 |
| H | -0.081296 | -2.339888 | 0.509360  |
| H | -0.081901 | 2.339831  | 0.509222  |
| H | 2.418607  | -1.228253 | 1.455658  |
| H | 2.418289  | 1.228896  | 1.455584  |
| H | -3.494570 | -0.000092 | 1.595052  |
| H | -3.487939 | 0.000115  | -0.269440 |

**1Pd (isomer 1)**

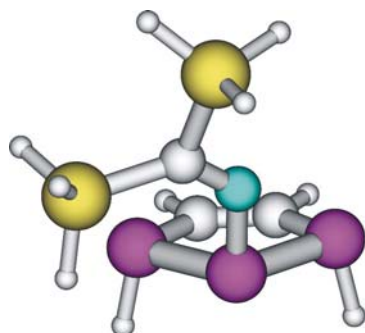

E=-1778.2548315

|   |           |           |           |
|---|-----------|-----------|-----------|
| C | -1.779767 | -0.207978 | -0.036747 |
| i | -3.083173 | -1.451489 | 0.619641  |
| i | -2.337041 | 1.624016  | -0.247105 |
| N | -0.663983 | -0.766108 | -0.339717 |
| P | 0.723160  | -0.052795 | -1.121319 |
| P | 1.257324  | 1.612433  | 0.307425  |
| C | 2.638264  | 0.762797  | 1.169982  |
| C | 3.018859  | -0.488844 | 0.896289  |
| P | 2.218662  | -1.549106 | -0.378856 |
| H | 2.042583  | 2.383605  | -0.597800 |
| H | 3.118272  | 1.319942  | 1.972528  |
| H | 3.812964  | -0.953679 | 1.478072  |
| H | 3.183503  | -1.310591 | -1.402528 |
| H | -3.748894 | 1.557933  | -0.711052 |
| H | -2.305272 | 2.337522  | 1.052711  |
| H | -1.526788 | 2.349377  | -1.256916 |
| H | -2.404786 | -2.567065 | 1.318269  |
| H | -4.014198 | -0.754679 | 1.549297  |
| H | -3.877849 | -1.968844 | -0.525966 |

**1Pd (isomer 2)**

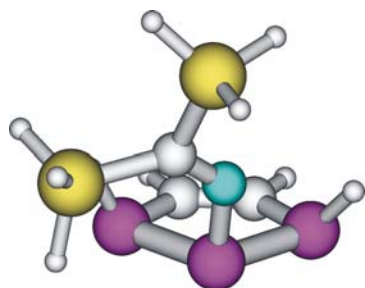

E=-1778.248869

|   |          |           |          |
|---|----------|-----------|----------|
| C | 0.004009 | 0.006867  | 0.073752 |
| N | 0.090299 | -0.081959 | 1.350513 |

|    |           |           |           |
|----|-----------|-----------|-----------|
| P  | 1.444832  | -0.188869 | 2.425746  |
| P  | 0.515182  | 0.766534  | 4.257718  |
| C  | 0.682369  | 2.508929  | 3.706827  |
| C  | 1.634050  | 2.867796  | 2.837338  |
| P  | 2.818660  | 1.628783  | 2.184473  |
| Si | -1.779743 | -0.185469 | -0.598748 |
| Si | 1.425481  | 0.190049  | -1.210443 |
| H  | 2.616082  | 1.851194  | 0.794649  |
| H  | 1.809997  | 3.913046  | 2.594326  |
| H  | 0.060570  | 3.254827  | 4.196481  |
| H  | -0.826278 | 0.535479  | 3.847126  |
| H  | 0.991317  | -0.537643 | -2.430419 |
| H  | 1.645001  | 1.615958  | -1.564405 |
| H  | 2.686357  | -0.400843 | -0.694612 |
| H  | -2.753115 | 0.131543  | 0.471257  |
| H  | -1.969953 | 0.726087  | -1.760222 |
| H  | -1.971896 | -1.581058 | -1.076214 |

**2Pa (isomer 1)**

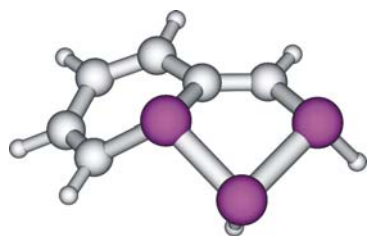

E=-1256.9954882

|   |           |           |           |
|---|-----------|-----------|-----------|
| P | -1.551563 | -1.371174 | 0.380983  |
| H | -1.030419 | -1.037394 | 1.668969  |
| P | 0.258361  | -0.733416 | -0.805781 |
| P | -2.424892 | 0.678403  | -0.099902 |
| C | 0.315135  | 0.996648  | -0.161582 |
| C | -0.859336 | 1.612782  | 0.093161  |
| C | 1.722642  | -1.404977 | 0.024994  |
| C | 2.758592  | -0.600063 | 0.345241  |
| C | 2.740121  | 0.851933  | 0.247172  |
| C | 1.628765  | 1.591871  | 0.015917  |
| H | 1.820782  | -2.483331 | 0.097098  |
| H | 1.690920  | 2.675536  | 0.070337  |
| H | 3.680672  | -1.052101 | 0.700075  |
| H | 3.674832  | 1.367855  | 0.439369  |
| H | -2.994225 | 0.959960  | 1.174971  |
| H | -0.906658 | 2.673128  | 0.330262  |

### 2Pa (isomer 2)

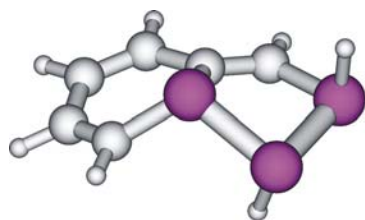

E=-1256.9980964

|   |           |           |           |
|---|-----------|-----------|-----------|
| C | 0.844577  | 1.631189  | -0.062753 |
| C | -0.323404 | 0.992459  | 0.164443  |
| C | -1.644373 | 1.582380  | 0.000374  |
| C | -2.753562 | 0.841002  | -0.233301 |
| C | -2.774684 | -0.610448 | -0.339047 |
| C | -1.730839 | -1.412573 | -0.037455 |
| P | -0.259223 | -0.740417 | 0.773875  |
| P | 1.587013  | -1.363349 | -0.338272 |
| P | 2.445860  | 0.720924  | -0.105047 |
| H | 1.107541  | -1.112858 | -1.658290 |
| H | -1.826778 | -2.490968 | -0.111422 |
| H | -1.711355 | 2.666140  | -0.041619 |
| H | -3.701701 | -1.061511 | -0.681478 |
| H | -3.690312 | 1.357737  | -0.414433 |
| H | 2.644582  | 0.549886  | 1.302569  |
| H | 0.866976  | 2.690159  | -0.307250 |

### 2Pa (isomer 3)

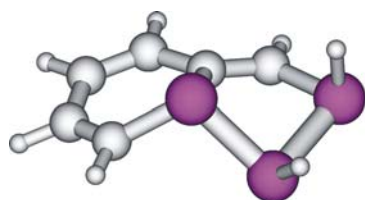

E=-1256.996439

|   |           |           |           |
|---|-----------|-----------|-----------|
| C | -0.013138 | -0.002834 | 0.016451  |
| P | -0.062348 | -0.162538 | 1.848710  |
| P | 2.188915  | 0.158703  | 2.034419  |
| P | 2.489305  | -1.135826 | 0.219679  |
| C | 3.885990  | -0.474660 | -0.729493 |
| C | 3.749755  | -0.101623 | -2.019366 |
| C | 2.474413  | 0.006478  | -2.709632 |
| C | 1.264906  | -0.092931 | -2.109768 |
| C | 1.099411  | -0.323693 | -0.683023 |
| H | 2.383964  | -0.861133 | 3.010826  |
| H | 4.873645  | -0.553991 | -0.286265 |
| H | 0.366830  | 0.100317  | -2.690149 |



|   |           |           |           |
|---|-----------|-----------|-----------|
| H | 4.639217  | 0.138637  | -2.595009 |
| H | 2.507901  | 0.239118  | -3.768877 |
| H | -0.024102 | -1.595686 | 1.912589  |
| H | -0.893680 | 0.390033  | -0.484251 |

**2Pa** (isomer 4)

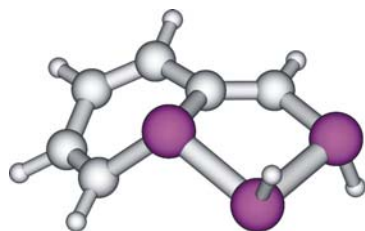

E=-1256.998628

|   |           |           |           |
|---|-----------|-----------|-----------|
| C | -0.023885 | 0.078998  | 0.020762  |
| C | -0.055350 | -0.049699 | 1.362818  |
| C | 1.141819  | -0.118425 | 2.196364  |
| C | 1.182789  | 0.416046  | 3.439878  |
| C | 0.059983  | 1.087451  | 4.077932  |
| C | -1.207933 | 1.052254  | 3.613574  |
| P | -1.649026 | -0.089445 | 2.274196  |
| P | -2.877297 | 1.001010  | 0.719924  |
| P | -1.505501 | 0.432596  | -0.990989 |
| H | -3.740161 | -0.108202 | 0.522675  |
| H | -2.008212 | 1.548059  | 4.153401  |
| H | 2.055650  | -0.495230 | 1.745532  |
| H | 0.272424  | 1.641017  | 4.988205  |
| H | 2.125982  | 0.411672  | 3.975790  |
| H | -1.109591 | 1.743896  | -1.392028 |
| H | 0.918610  | -0.013581 | -0.516429 |

**2Pb** (isomer 1)

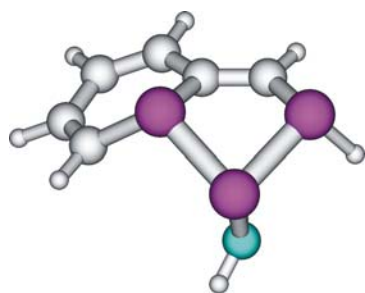

E=-1312.384445

|   |           |           |          |
|---|-----------|-----------|----------|
| C | 0.003560  | -0.036909 | 0.030879 |
| C | -0.000290 | -0.020690 | 1.386903 |
| C | 1.184226  | 0.061635  | 2.219696 |
| C | 1.163330  | 0.546995  | 3.486240 |

|   |           |           |           |
|---|-----------|-----------|-----------|
| C | -0.028673 | 1.022784  | 4.165433  |
| C | -1.288422 | 0.895421  | 3.688927  |
| P | -1.642473 | -0.086551 | 2.216383  |
| P | -2.736324 | 1.211918  | 0.669488  |
| P | -1.596881 | -0.036859 | -0.852724 |
| N | -1.929577 | 2.715993  | 0.529232  |
| H | -2.130630 | 1.246331  | 4.276911  |
| H | 2.139386  | -0.182612 | 1.761493  |
| H | 0.117528  | 1.499572  | 5.130902  |
| H | 2.102905  | 0.638511  | 4.020788  |
| H | -1.332154 | 1.008135  | -1.782108 |
| H | 0.925914  | -0.134265 | -0.536574 |
| H | -2.373659 | 3.501279  | 0.986247  |
| H | -0.918427 | 2.755408  | 0.600203  |

**2Pb** (isomer 2)

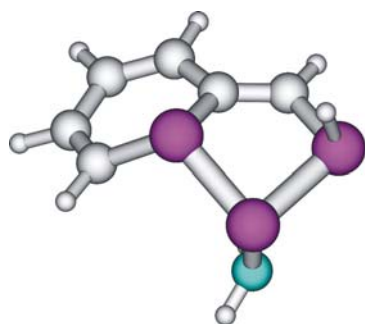

E=-1312.3839549

|   |           |           |           |
|---|-----------|-----------|-----------|
| C | -0.617705 | 1.776351  | 0.212097  |
| P | -2.266999 | 1.031165  | -0.110363 |
| P | -1.598911 | -1.144922 | -0.142467 |
| P | 0.373896  | -0.442466 | -1.045742 |
| C | 1.769884  | -1.379845 | -0.393426 |
| C | 2.833655  | -0.762310 | 0.169649  |
| C | 2.897020  | 0.659657  | 0.457292  |
| C | 1.854605  | 1.519162  | 0.342886  |
| C | 0.524396  | 1.101577  | -0.067215 |
| N | -1.376197 | -1.379787 | 1.538792  |
| H | 1.811362  | -2.442153 | -0.612715 |
| H | 1.979012  | 2.548827  | 0.668099  |
| H | 3.712703  | -1.351140 | 0.416493  |
| H | 3.840109  | 1.041365  | 0.834734  |
| H | -2.249261 | 1.059406  | -1.543385 |
| H | -0.591391 | 2.745542  | 0.703097  |
| H | -1.268049 | -2.338836 | 1.837611  |
| H | -0.792010 | -0.748703 | 2.075412  |

### 2Pb (isomer 3)

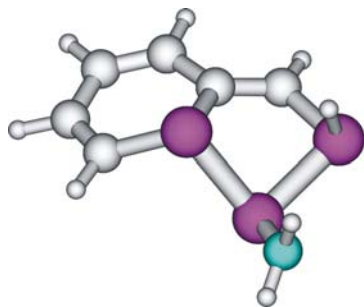

E=-1312.383204

|   |           |           |           |
|---|-----------|-----------|-----------|
| C | 0.103510  | -0.017248 | -0.074696 |
| C | 0.031581  | -0.024942 | 1.283052  |
| C | 1.191971  | 0.097329  | 2.146280  |
| C | 1.129247  | 0.494621  | 3.439925  |
| C | -0.096005 | 0.842884  | 4.132666  |
| C | -1.333519 | 0.687749  | 3.611858  |
| P | -1.636559 | -0.168688 | 2.046916  |
| P | -2.493501 | 1.294355  | 0.496006  |
| N | -4.106189 | 0.827852  | 0.207761  |
| P | -1.412658 | 0.062374  | -1.094854 |
| H | -2.204411 | 0.945212  | 4.206978  |
| H | 2.164462  | -0.063226 | 1.687918  |
| H | 0.005798  | 1.247130  | 5.136136  |
| H | 2.056821  | 0.608891  | 3.991084  |
| H | -2.008747 | -1.182237 | -0.683124 |
| H | 1.066026  | 0.030190  | -0.576372 |
| H | -4.833562 | 1.448946  | 0.528259  |
| H | -4.395949 | -0.141684 | 0.178398  |

### 2Pb (isomer 4)

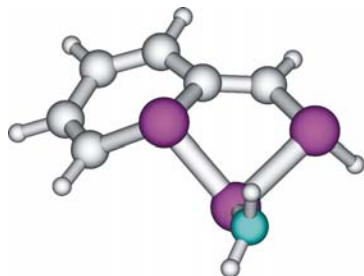

E=-1312.383524

|   |          |           |           |
|---|----------|-----------|-----------|
| C | 0.063197 | 0.102758  | -0.002084 |
| P | 0.086704 | 0.105815  | 1.821404  |
| P | 2.371972 | -0.006971 | 1.929424  |
| N | 2.544853 | -0.889338 | 3.382023  |
| C | 1.004797 | -0.584206 | -0.692586 |

|   |           |           |           |
|---|-----------|-----------|-----------|
| P | 2.231906  | -1.577580 | 0.261050  |
| C | 3.674604  | -1.363284 | -0.816572 |
| C | 3.544700  | -1.103949 | -2.135619 |
| C | 2.284361  | -0.802542 | -2.792688 |
| C | 1.121656  | -0.563699 | -2.139710 |
| H | 4.648261  | -1.608172 | -0.403566 |
| H | 0.249465  | -0.246440 | -2.705824 |
| H | 4.431244  | -1.122970 | -2.763696 |
| H | 2.301732  | -0.706062 | -3.873062 |
| H | -0.088330 | 1.509122  | 2.008284  |
| H | -0.728559 | 0.638300  | -0.520546 |
| H | 3.451667  | -0.850130 | 3.823188  |
| H | 2.071218  | -1.772109 | 3.532283  |

### 2Pc (isomer 1)

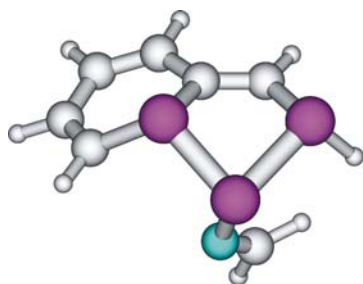

E=-1350.463413

|   |           |           |           |
|---|-----------|-----------|-----------|
| C | -0.025152 | 0.112066  | -0.032297 |
| C | -0.010466 | 0.067308  | 1.321215  |
| C | 1.184232  | 0.116593  | 2.143063  |
| C | 1.173309  | 0.506815  | 3.440706  |
| C | -0.015470 | 0.922048  | 4.167804  |
| C | -1.278329 | 0.828014  | 3.699643  |
| P | -1.637240 | -0.071970 | 2.174730  |
| P | -2.788886 | 1.257808  | 0.741538  |
| N | -2.025913 | 2.770795  | 1.034335  |
| C | -1.248848 | 3.426440  | 0.278876  |
| P | -1.639681 | 0.101807  | -0.889980 |
| H | -2.116917 | 1.150135  | 4.307195  |
| H | 2.136085  | -0.076273 | 1.654958  |
| H | 0.140915  | 1.337682  | 5.159390  |
| H | 2.118777  | 0.574318  | 3.968214  |
| H | -1.411993 | 1.167222  | -1.809876 |
| H | 0.893746  | 0.069557  | -0.611791 |
| H | -0.914881 | 3.087167  | -0.709623 |
| H | -0.880138 | 4.397687  | 0.614469  |

### 2Pc (isomer 2)

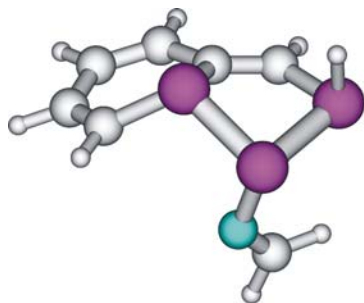

E=-1350.4635627

|   |           |           |           |
|---|-----------|-----------|-----------|
| C | -0.446716 | 1.821382  | 0.408283  |
| P | -2.098359 | 1.273479  | -0.180270 |
| P | -1.502873 | -0.886160 | -0.713607 |
| N | -1.233367 | -1.684058 | 0.788514  |
| C | -1.745456 | -1.381194 | 1.908399  |
| C | 0.680758  | 1.141219  | 0.095738  |
| P | 0.569359  | -0.151637 | -1.199828 |
| C | 1.834165  | -1.306579 | -0.629481 |
| C | 2.870697  | -0.877775 | 0.121926  |
| C | 2.974518  | 0.453019  | 0.698727  |
| C | 1.986339  | 1.379710  | 0.690355  |
| H | 1.826110  | -2.311247 | -1.037582 |
| H | 2.125297  | 2.308388  | 1.237286  |
| H | 3.690257  | -1.562118 | 0.321806  |
| H | 3.896309  | 0.688678  | 1.220394  |
| H | -1.998950 | 1.619863  | -1.565733 |
| H | -0.416162 | 2.662353  | 1.096174  |
| H | -2.409073 | -0.523170 | 2.074675  |
| H | -1.527952 | -2.008267 | 2.775256  |

### 2Pc (isomer 3)

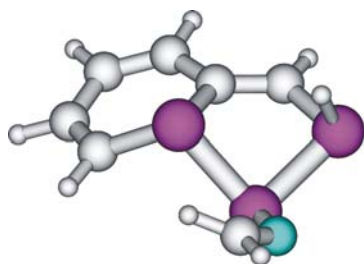

E=-1350.4640895

|   |           |           |           |
|---|-----------|-----------|-----------|
| C | 0.323555  | 2.051515  | -0.080281 |
| P | -1.501922 | 1.896275  | -0.042331 |
| P | -1.345545 | -0.195531 | 0.863864  |
| N | -2.801938 | -0.832679 | 0.240260  |
| C | -2.960272 | -1.857428 | -0.488629 |

|   |           |           |           |
|---|-----------|-----------|-----------|
| C | 1.121064  | 0.964684  | -0.242615 |
| P | 0.320864  | -0.647581 | -0.642931 |
| C | 1.529087  | -1.782111 | 0.085428  |
| C | 2.815926  | -1.431216 | 0.299282  |
| C | 3.331664  | -0.084891 | 0.137556  |
| C | 2.567109  | 1.004898  | -0.110768 |
| H | 1.226267  | -2.818249 | 0.200719  |
| H | 3.034368  | 1.985953  | -0.131727 |
| H | 3.524775  | -2.194519 | 0.607864  |
| H | 4.398997  | 0.053413  | 0.274455  |
| H | -1.692654 | 1.416585  | -1.381601 |
| H | 0.758351  | 3.028387  | 0.112339  |
| H | -2.135271 | -2.461887 | -0.887870 |
| H | -3.971030 | -2.171083 | -0.754887 |

### 2Pc (isomer 4)

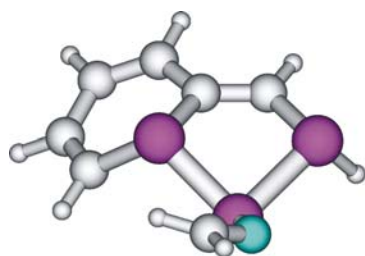

E=-1350.4637742

|   |           |           |           |
|---|-----------|-----------|-----------|
| C | 0.350041  | 2.026274  | -0.146603 |
| C | 1.123748  | 0.933288  | -0.332818 |
| C | 2.578334  | 0.964445  | -0.334887 |
| C | 3.339202  | -0.097796 | 0.020683  |
| C | 2.804842  | -1.382983 | 0.441959  |
| C | 1.506987  | -1.738931 | 0.336117  |
| P | 0.323019  | -0.709897 | -0.575972 |
| P | -1.415664 | -0.216820 | 0.827087  |
| N | -2.822886 | -0.823439 | 0.048768  |
| C | -2.911647 | -1.875743 | -0.651672 |
| P | -1.468319 | 1.908058  | -0.020585 |
| H | 1.184162  | -2.727007 | 0.648540  |
| H | 3.057385  | 1.919924  | -0.532129 |
| H | 3.511270  | -2.092520 | 0.863804  |
| H | 4.416192  | 0.025709  | 0.059808  |
| H | -1.593021 | 2.624425  | 1.207584  |
| H | 0.799177  | 3.015671  | -0.091941 |
| H | -2.057974 | -2.505008 | -0.935428 |
| H | -3.891574 | -2.188558 | -1.016230 |

## 2Pd (isomer 1)

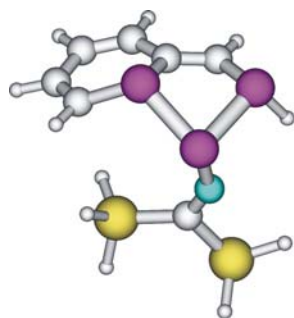

E=-1931.896079

|    |           |           |           |
|----|-----------|-----------|-----------|
| P  | -0.266419 | 1.273011  | -1.300226 |
| P  | 1.856393  | 0.353370  | -0.919286 |
| C  | 1.821954  | 0.496026  | 0.910756  |
| C  | 1.208980  | 1.595879  | 1.422873  |
| P  | 0.416965  | 2.771124  | 0.286972  |
| C  | 1.998196  | -1.425186 | -1.126311 |
| C  | 2.455783  | -2.225519 | -0.133200 |
| C  | 2.702426  | -1.794443 | 1.225880  |
| C  | 2.417442  | -0.556108 | 1.705170  |
| H  | 1.867629  | -1.822507 | -2.127342 |
| H  | 2.663276  | -3.267392 | -0.361617 |
| H  | 3.103258  | -2.533208 | 1.911536  |
| H  | 2.560982  | -0.355305 | 2.764021  |
| N  | -1.600381 | 0.652297  | -0.484241 |
| C  | -2.194195 | -0.428512 | -0.141574 |
| Si | -1.547687 | -2.218562 | -0.401666 |
| H  | -0.650618 | -2.617509 | 0.709246  |
| H  | -0.849166 | -2.323883 | -1.705726 |
| H  | -2.738596 | -3.108747 | -0.401960 |
| Si | -3.923531 | -0.190448 | 0.645635  |
| H  | -4.065119 | -1.106281 | 1.809916  |
| H  | -4.086245 | 1.219115  | 1.071769  |
| H  | -4.967196 | -0.552138 | -0.350598 |
| H  | -0.831115 | 2.921447  | 0.953090  |
| H  | 1.226142  | 1.816196  | 2.487006  |

## 2Pd (isomer 2)

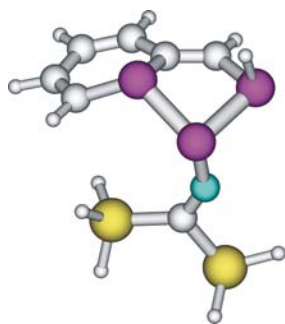

E=-1931.8951992

|    |           |           |           |
|----|-----------|-----------|-----------|
| C  | 0.108364  | -0.120323 | -0.017276 |
| C  | 0.067310  | -0.055877 | 1.338545  |
| C  | 1.233477  | -0.098063 | 2.199402  |
| C  | 1.223185  | 0.272157  | 3.505016  |
| C  | 0.059846  | 0.753814  | 4.220238  |
| C  | -1.188410 | 0.816381  | 3.698274  |
| P  | -1.585426 | 0.066996  | 2.115481  |
| P  | -2.581064 | 1.385386  | 0.496737  |
| N  | -1.915913 | 2.891874  | 0.144638  |
| C  | -1.439724 | 3.959784  | 0.659929  |
| Si | -1.035127 | 4.273061  | 2.513521  |
| P  | -1.381205 | 0.188995  | -1.035150 |
| Si | -1.166775 | 5.398827  | -0.576726 |
| H  | -2.015419 | 1.165031  | 4.307589  |
| H  | 0.214039  | 1.080161  | 5.244903  |
| H  | 2.159466  | 0.247732  | 4.052753  |
| H  | 2.179135  | -0.367390 | 1.735964  |
| H  | 0.291064  | 3.711196  | 2.864107  |
| H  | -2.094222 | 3.695658  | 3.376891  |
| H  | -0.998895 | 5.747611  | 2.697479  |
| H  | 0.168352  | 6.007601  | -0.328806 |
| H  | -1.259803 | 4.890767  | -1.964201 |
| H  | -2.196730 | 6.444751  | -0.334932 |
| H  | -2.134961 | -0.973297 | -0.666447 |
| H  | 1.048522  | -0.265632 | -0.542139 |



## 2Pd (isomer 3)

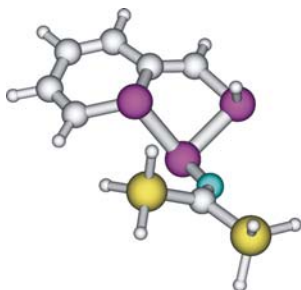

E=-1931.898382

|    |           |           |           |
|----|-----------|-----------|-----------|
| C  | -0.066312 | -0.153769 | -0.011053 |
| P  | -0.091187 | -0.361615 | 1.804054  |
| P  | 2.184428  | -0.118703 | 1.909305  |
| N  | 2.421166  | -0.953514 | 3.349272  |
| C  | 3.144495  | -1.900940 | 3.822059  |
| Si | 2.963707  | -2.182869 | 5.708397  |
| C  | 0.995375  | -0.557543 | -0.759152 |
| P  | 2.327216  | -1.521074 | 0.071725  |
| C  | 3.732750  | -1.066736 | -0.970123 |
| C  | 3.589336  | -0.602232 | -2.231392 |
| C  | 2.316475  | -0.261212 | -2.833811 |
| C  | 1.136371  | -0.241778 | -2.169179 |
| Si | 4.400314  | -2.996212 | 2.864465  |
| H  | 4.719305  | -1.328096 | -0.601343 |
| H  | 4.474848  | -0.475778 | -2.848090 |
| H  | 2.328258  | 0.042675  | -3.875236 |
| H  | 0.244702  | 0.107615  | -2.683276 |
| H  | 4.935888  | -2.287755 | 1.675207  |
| H  | 3.779893  | -4.281208 | 2.459019  |
| H  | 5.516342  | -3.285667 | 3.802667  |
| H  | 4.073528  | -1.485628 | 6.411556  |
| H  | 1.655823  | -1.662259 | 6.168153  |
| H  | 3.078059  | -3.637811 | 5.999968  |
| H  | -0.030932 | -1.794913 | 1.848828  |
| H  | -0.880183 | 0.399720  | -0.471396 |

## 2Pd (isomer 4)

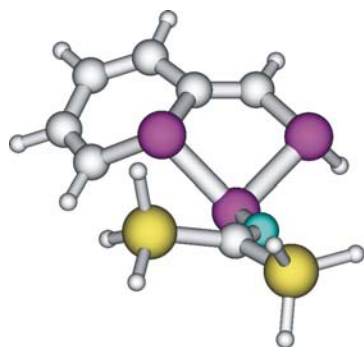

E=-1931.897707

|    |           |           |           |
|----|-----------|-----------|-----------|
| C  | 0.020143  | 0.150482  | -0.015552 |
| C  | -0.046516 | 0.014768  | 1.328941  |
| C  | 1.119230  | -0.217509 | 2.168058  |
| C  | 1.189652  | 0.179143  | 3.460637  |
| C  | 0.122539  | 0.875959  | 4.158896  |
| C  | -1.128970 | 1.031089  | 3.676402  |
| P  | -1.676132 | 0.169747  | 2.177044  |
| P  | -2.453044 | 1.738789  | 0.683734  |
| N  | -4.058521 | 1.354172  | 0.284770  |
| C  | -5.107538 | 0.978053  | 0.919240  |
| Si | -5.282155 | 0.527279  | 2.780890  |
| P  | -1.443850 | 0.577642  | -1.015489 |
| Si | -6.698575 | 0.941739  | -0.148298 |
| H  | -1.883095 | 1.539787  | 4.267564  |
| H  | 0.363019  | 1.289360  | 5.134491  |
| H  | 2.119339  | 0.030762  | 3.999444  |
| H  | 2.001035  | -0.636976 | 1.690701  |
| H  | -4.254359 | 1.209837  | 3.606430  |
| H  | -5.218431 | -0.939896 | 2.986292  |
| H  | -6.628295 | 1.002606  | 3.197831  |
| H  | -7.466121 | 2.194878  | 0.083683  |
| H  | -6.339354 | 0.818071  | -1.579451 |
| H  | -7.551888 | -0.201760 | 0.275634  |
| H  | -0.851320 | 1.674912  | -1.710653 |
| H  | 0.962321  | -0.008354 | -0.535974 |

**3Pa** (isomer 1,  $C_s$ )

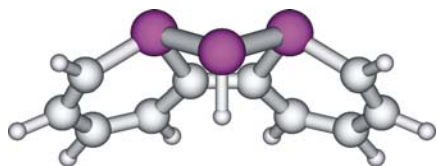

E=-1410.6467474

|   |           |           |           |
|---|-----------|-----------|-----------|
| H | 0.000000  | -1.323590 | 1.714027  |
| P | 0.000001  | -2.122401 | 0.527380  |
| P | -1.482604 | -0.893410 | -0.670471 |
| P | 1.482604  | -0.893410 | -0.670471 |
| C | -0.690342 | 0.744152  | -0.381485 |
| C | 0.690343  | 0.744152  | -0.381485 |
| C | -2.996333 | -0.695148 | 0.290666  |
| C | 2.996332  | -0.695148 | 0.290667  |
| C | -3.510315 | 0.531616  | 0.546226  |
| C | 3.510314  | 0.531617  | 0.546227  |
| C | -2.836136 | 1.778046  | 0.266215  |
| C | 2.836136  | 1.778046  | 0.266214  |
| C | -1.538768 | 1.876479  | -0.141436 |
| C | 1.538768  | 1.876479  | -0.141436 |
| H | -3.574550 | -1.588143 | 0.504223  |
| H | 3.574549  | -1.588143 | 0.504225  |
| H | -4.497506 | 0.598007  | 0.995474  |
| H | 4.497504  | 0.598008  | 0.995476  |
| H | -3.384705 | 2.692300  | 0.464169  |
| H | 3.384705  | 2.692300  | 0.464168  |
| H | -1.099125 | 2.867910  | -0.200288 |
| H | 1.099125  | 2.867910  | -0.200289 |

**3Pa** (isomer 2,  $C_s$ )

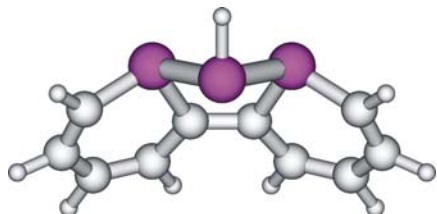

E=-1410.6471477

|   |           |           |           |
|---|-----------|-----------|-----------|
| P | 2.049462  | -0.598586 | 0.000000  |
| H | 3.193300  | 0.251357  | 0.000000  |
| P | 0.905778  | 0.659498  | 1.519207  |
| P | 0.905778  | 0.659498  | -1.519207 |
| C | -0.718932 | 0.397252  | 0.689932  |
| C | -0.718932 | 0.397252  | -0.689932 |
| C | 0.660936  | -0.348186 | 3.001009  |

|   |           |           |           |
|---|-----------|-----------|-----------|
| C | 0.660936  | -0.348186 | -3.001009 |
| H | 1.542346  | -0.604205 | 3.580151  |
| H | 1.542346  | -0.604205 | -3.580151 |
| C | -0.574924 | -0.591327 | 3.494384  |
| C | -0.574924 | -0.591327 | -3.494384 |
| H | -0.666052 | -1.070880 | 4.465175  |
| H | -0.666052 | -1.070880 | -4.465175 |
| C | -1.804044 | -0.255557 | 2.812159  |
| C | -1.804044 | -0.255557 | -2.812159 |
| H | -2.731743 | -0.432466 | 3.345179  |
| H | -2.731743 | -0.432466 | -3.345179 |
| C | -1.870584 | 0.180038  | 1.523601  |
| C | -1.870584 | 0.180038  | -1.523601 |
| H | -2.853548 | 0.285478  | 1.074844  |
| H | -2.853548 | 0.285478  | -1.074844 |

### 3Pb (isomer 1)

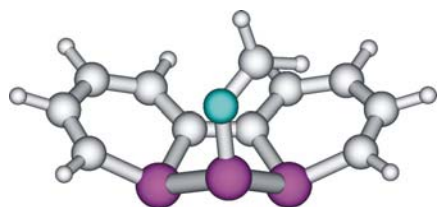

E=-1466.0378791

|   |           |           |           |
|---|-----------|-----------|-----------|
| C | -3.049052 | -0.582954 | -0.097501 |
| P | -1.454205 | -0.668260 | -0.911906 |
| P | -0.003799 | -2.089236 | 0.180105  |
| N | -0.032185 | -1.659654 | 1.810870  |
| C | -3.566286 | 0.587940  | 0.357044  |
| C | -2.854911 | 1.836623  | 0.388461  |
| C | -1.533703 | 1.977843  | 0.064729  |
| C | -0.693773 | 0.908103  | -0.373115 |
| C | 0.700373  | 0.907065  | -0.373633 |
| P | 1.457605  | -0.669838 | -0.913247 |
| C | 3.050816  | -0.589257 | -0.095829 |
| C | 3.570080  | 0.579497  | 0.363078  |
| C | 2.861717  | 1.829574  | 0.394408  |
| C | 1.541644  | 1.974503  | 0.067118  |
| H | -3.660692 | -1.478970 | -0.111898 |
| H | 3.661500  | -1.485998 | -0.112471 |
| H | -4.590658 | 0.594815  | 0.720179  |
| H | 4.593717  | 0.583279  | 0.728323  |
| H | -3.394193 | 2.708484  | 0.741864  |
| H | 3.402120  | 2.699741  | 0.750319  |
| H | -1.078411 | 2.951501  | 0.221881  |

### 3Pb (isomer 2)

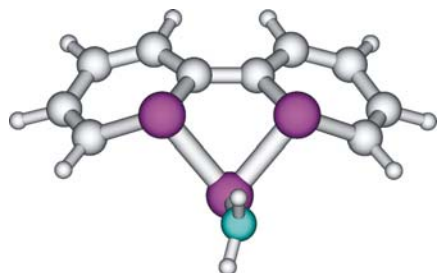

E=-1466.0367668

|   |           |           |           |
|---|-----------|-----------|-----------|
| C | -3.044715 | 0.383746  | -0.203996 |
| P | -1.497407 | 0.639568  | 0.687943  |
| P | -0.033532 | 1.754647  | -0.707651 |
| N | -0.152509 | 3.331804  | -0.093826 |
| C | -3.518732 | -0.850481 | -0.501275 |
| C | -2.787969 | -2.073032 | -0.288313 |
| C | -1.480858 | -2.124997 | 0.099023  |
| C | -0.673889 | -0.975369 | 0.384455  |
| C | 0.716794  | -0.956122 | 0.384136  |
| P | 1.494983  | 0.680235  | 0.683335  |
| C | 3.051328  | 0.462714  | -0.200151 |
| C | 3.557899  | -0.757909 | -0.501907 |
| C | 2.857715  | -1.998311 | -0.292840 |
| C | 1.553485  | -2.084638 | 0.097493  |
| H | -3.665062 | 1.259141  | -0.367251 |
| H | 3.653477  | 1.352350  | -0.355995 |
| H | -4.515156 | -0.938636 | -0.926320 |
| H | 4.557716  | -0.819645 | -0.923528 |
| H | -3.296781 | -3.004055 | -0.512323 |
| H | 3.389880  | -2.915905 | -0.518344 |
| H | -1.004210 | -3.099937 | 0.125522  |
| H | 1.102633  | -3.071733 | 0.125446  |
| H | 0.092917  | 4.099486  | -0.699052 |
| H | -0.094881 | 3.545946  | 0.894465  |

### 3Pc (isomer 1)

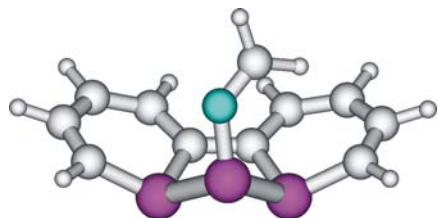

E=-1504.1163603

|   |           |           |          |
|---|-----------|-----------|----------|
| C | -3.091321 | -0.528622 | -0.23009 |
| P | -1.508555 | -0.502202 | -1.07140 |

|   |           |           |          |
|---|-----------|-----------|----------|
| P | -0.030307 | -2.051316 | -0.21465 |
| N | -0.204153 | -1.845491 | 1.45702  |
| C | -3.604450 | 0.580104  | 0.36016  |
| C | -2.893542 | 1.818509  | 0.53800  |
| C | -1.576531 | 2.001040  | 0.22406  |
| C | -0.740181 | 0.995903  | -0.35322 |
| C | 0.651025  | 1.006862  | -0.38242 |
| P | 1.413400  | -0.485509 | -1.12004 |
| C | 3.028179  | -0.477148 | -0.33431 |
| C | 3.557061  | 0.653943  | 0.20324  |
| C | 2.835716  | 1.884886  | 0.37810  |
| C | 1.500316  | 2.038471  | 0.12742  |
| H | -3.697121 | -1.421571 | -0.33895 |
| H | 3.646325  | -1.360129 | -0.46085 |
| H | -4.625209 | 0.540953  | 0.73107  |
| H | 4.593979  | 0.637758  | 0.52790  |
| H | -3.430198 | 2.637206  | 1.00422  |
| H | 3.381320  | 2.727100  | 0.78904  |
| H | -1.118600 | 2.945973  | 0.50163  |
| H | 1.043521  | 2.986612  | 0.39581  |
| C | 0.603175  | -1.425290 | 2.34127  |
| H | 1.629979  | -1.109601 | 2.12931  |
| H | 0.270317  | -1.372412 | 3.37980  |

### 3Pc (isomer 2)

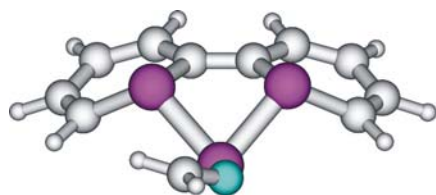

E=-1504.115755

|   |           |           |           |
|---|-----------|-----------|-----------|
| C | -0.063858 | 0.135689  | 0.335464  |
| C | -0.018160 | -0.114939 | 1.665819  |
| C | 1.197524  | -0.213684 | 2.433193  |
| C | 2.448138  | -0.208001 | 1.889215  |
| C | 2.721216  | -0.060703 | 0.489292  |
| C | 3.904607  | -0.433869 | -0.135365 |
| C | 5.042826  | -0.999855 | 0.529954  |
| C | 6.024692  | -1.713842 | -0.090676 |
| C | 6.033501  | -2.025443 | -1.496775 |
| C | 5.145857  | -1.527652 | -2.391182 |
| P | 3.955722  | -0.241553 | -1.964087 |
| P | 1.792030  | -1.058955 | -2.179349 |
| N | 1.120394  | -0.288120 | -3.537060 |
| C | 1.678902  | 0.056512  | -4.622333 |
| P | 1.402156  | 0.598919  | -0.610088 |
| H | -1.018571 | 0.217525  | -0.173551 |

|   |           |           |           |
|---|-----------|-----------|-----------|
| H | 5.236461  | -1.783620 | -3.442134 |
| H | -0.952689 | -0.253594 | 2.203024  |
| H | 6.809388  | -2.699610 | -1.849337 |
| H | 1.101287  | -0.367236 | 3.502249  |
| H | 6.823906  | -2.124945 | 0.516076  |
| H | 3.284765  | -0.399195 | 2.553785  |
| H | 5.093367  | -0.912217 | 1.610620  |
| H | 2.749083  | -0.069314 | -4.830049 |
| H | 1.077863  | 0.510845  | -5.411619 |

**4Pa** (isomer 1,  $C_s$ )

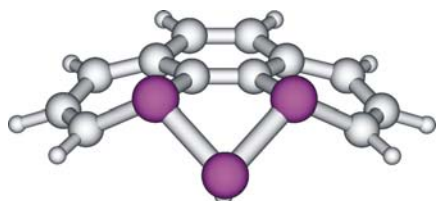

E=-1486.888659

|   |           |           |           |
|---|-----------|-----------|-----------|
| P | -0.018999 | 0.016809  | -0.053154 |
| H | -0.159859 | 0.141432  | 1.365033  |
| P | 2.268212  | -0.007279 | -0.137000 |
| P | 0.283650  | -2.250418 | -0.137000 |
| C | 2.478051  | -1.277873 | 1.165679  |
| C | 1.570346  | -2.303847 | 1.165679  |
| C | 2.983947  | 1.399119  | 0.711704  |
| C | -1.025039 | -3.132215 | 0.711704  |
| C | 3.885117  | 1.233121  | 1.726269  |
| C | -0.750453 | -4.006437 | 1.726269  |
| C | 4.187627  | 0.004141  | 2.386110  |
| C | 0.506233  | -4.156918 | 2.386110  |
| C | 3.501495  | -1.180165 | 2.171934  |
| C | 1.598093  | -3.331570 | 2.171934  |
| C | 3.651430  | -2.323621 | 3.042296  |
| C | 2.751299  | -3.341034 | 3.042296  |
| H | 2.841213  | 2.380819  | 0.273298  |
| H | -2.016816 | -3.110184 | 0.273298  |
| H | 4.416637  | 2.113820  | 2.077290  |
| H | -1.559811 | -4.641326 | 2.077290  |
| H | 4.930626  | 0.030007  | 3.176294  |
| H | 0.571109  | -4.897530 | 3.176294  |
| H | 4.472774  | -2.323205 | 3.751651  |
| H | 2.850982  | -4.156308 | 3.751651  |

**4Pa** (isomer 2,  $C_s$ )

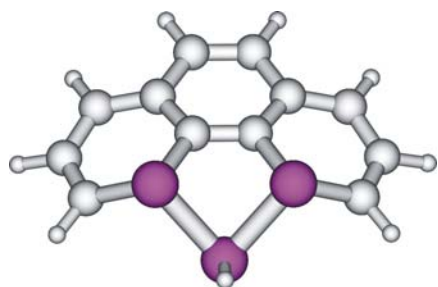

E=-1486.889737

|   |           |           |           |
|---|-----------|-----------|-----------|
| P | 0.004759  | -0.004117 | 0.003123  |
| H | 0.077832  | -0.067338 | 1.424998  |
| P | 2.285600  | 0.035698  | -0.279295 |
| P | 0.293390  | -2.266972 | -0.279295 |
| C | 2.186299  | -0.985334 | -1.800855 |
| C | 1.289525  | -2.021858 | -1.800855 |
| C | 2.808548  | 1.587413  | -1.014247 |
| C | -1.166982 | -3.007653 | -1.014247 |
| C | 3.475085  | 1.625341  | -2.205170 |
| C | -1.108654 | -3.672715 | -2.205170 |
| C | 3.627305  | 0.529716  | -3.107476 |
| C | -0.002527 | -3.665778 | -3.107476 |
| C | 2.989492  | -0.690032 | -2.960742 |
| C | 1.112809  | -2.859172 | -2.960742 |
| C | 2.965272  | -1.668022 | -4.023010 |
| C | 2.077149  | -2.694548 | -4.023010 |
| H | 2.761595  | 2.477254  | -0.395603 |
| H | -2.054325 | -3.089166 | -0.395603 |
| H | 3.924089  | 2.568095  | -2.506692 |
| H | -1.977031 | -4.252639 | -2.506692 |
| H | 4.195279  | 0.703042  | -4.015481 |
| H | -0.092365 | -4.252775 | -4.015481 |
| H | 3.635844  | -1.526440 | -4.864410 |
| H | 2.033481  | -3.378511 | -4.864410 |

**4Pb** (isomer 1)

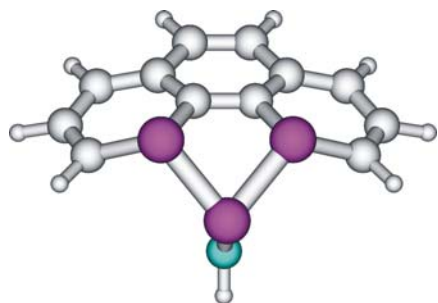



E=-1542.2812661

|   |           |           |           |
|---|-----------|-----------|-----------|
| C | -0.679149 | 2.879944  | 0.195226  |
| C | 0.679805  | 2.879799  | 0.195270  |
| C | 1.438880  | 1.673891  | -0.035687 |
| C | 0.691036  | 0.520466  | -0.445733 |
| C | -0.690807 | 0.520638  | -0.445789 |
| C | -1.438450 | 1.674183  | -0.035777 |
| C | 2.798698  | 1.599809  | 0.245363  |
| C | 3.545849  | 0.393801  | 0.235475  |
| C | 3.072461  | -0.840832 | -0.133036 |
| P | 1.476838  | -1.062269 | -0.886569 |
| P | -0.000425 | -2.422875 | 0.318067  |
| N | -0.000579 | -1.886491 | 1.913029  |
| P | -1.476904 | -1.061944 | -0.886734 |
| C | -3.072489 | -0.840269 | -0.133115 |
| C | -3.545643 | 0.394444  | 0.235398  |
| C | -2.798292 | 1.600339  | 0.245240  |
| H | -3.741081 | -1.694157 | -0.117266 |
| H | 3.740932  | -1.694817 | -0.117240 |
| H | -4.584619 | 0.462258  | 0.547949  |
| H | 4.584861  | 0.461430  | 0.547945  |
| H | -3.304212 | 2.505763  | 0.563602  |
| H | 3.304764  | 2.505142  | 0.563755  |
| H | 1.223642  | 3.790416  | 0.425699  |
| H | -1.222810 | 3.790674  | 0.425624  |
| H | -0.000815 | -2.541569 | 2.679222  |
| H | -0.000642 | -0.910652 | 2.181018  |

**4Pb** (isomer 2)

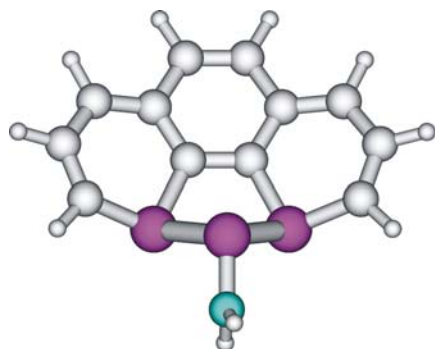

E=-1542.280699

|   |           |           |           |
|---|-----------|-----------|-----------|
| C | -0.039113 | -0.137969 | -0.001412 |
| C | -0.034857 | -0.130221 | 1.355841  |
| C | 1.193411  | -0.035693 | 2.106440  |
| C | 2.383821  | 0.271126  | 1.357882  |
| C | 2.379118  | 0.263320  | -0.023452 |
| C | 1.184388  | -0.052000 | -0.760883 |
| C | 1.234192  | -0.340268 | 3.459375  |

|   |           |           |           |
|---|-----------|-----------|-----------|
| C | 2.433527  | -0.474137 | 4.208855  |
| C | 3.692303  | -0.208794 | 3.741295  |
| P | 3.996360  | 0.577324  | 2.164449  |
| P | 5.050279  | -0.892774 | 0.657183  |
| P | 3.986620  | 0.561953  | -0.844527 |
| C | 3.673814  | -0.248035 | -2.408412 |
| C | 2.412017  | -0.517941 | -2.864549 |
| C | 1.216704  | -0.372526 | -2.110402 |
| N | 6.648617  | -0.354241 | 0.613883  |
| H | 4.520483  | -0.377347 | -3.074458 |
| H | 4.542371  | -0.326691 | 4.405247  |
| H | 2.305159  | -0.875471 | -3.885577 |
| H | 2.332833  | -0.817112 | 5.235470  |
| H | 0.278418  | -0.612191 | -2.599588 |
| H | 0.298905  | -0.574547 | 3.956952  |
| H | -0.961839 | -0.258413 | 1.905480  |
| H | -0.969504 | -0.272491 | -0.543758 |
| H | 7.402763  | -1.015829 | 0.700292  |
| H | 6.925281  | 0.619291  | 0.625995  |

**4Pc** (isomer 1)

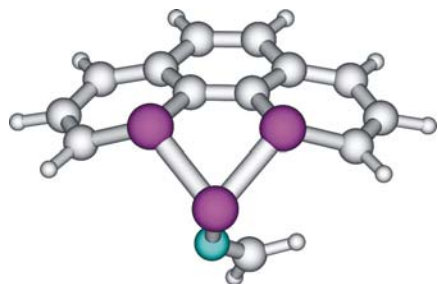

E=-1580.3598884

|   |           |           |           |
|---|-----------|-----------|-----------|
| C | -1.352210 | 1.779134  | -0.071027 |
| C | -0.566869 | 2.938428  | 0.277618  |
| C | 0.790084  | 2.892387  | 0.324851  |
| C | 1.521687  | 1.685818  | 0.022008  |
| C | 0.756159  | 0.588533  | -0.495404 |
| C | -0.624693 | 0.630221  | -0.528931 |
| C | 2.872243  | 1.557040  | 0.323371  |
| C | 3.592987  | 0.339232  | 0.225706  |
| C | 3.101733  | -0.849999 | -0.250182 |
| P | 1.516562  | -0.970768 | -1.043059 |
| P | -0.043300 | -2.400861 | -0.000521 |
| P | -1.450916 | -0.882712 | -1.111412 |
| C | -3.061651 | -0.663878 | -0.386900 |
| C | -3.513619 | 0.564895  | 0.030199  |
| C | -2.726145 | 1.737971  | 0.142730  |
| N | 0.091117  | -2.013530 | 1.621450  |
| C | -0.691888 | -1.523746 | 2.492652  |
| H | -3.756823 | -1.494130 | -0.452738 |

|   |           |           |           |
|---|-----------|-----------|-----------|
| H | 3.748993  | -1.718913 | -0.291089 |
| H | -4.561543 | 0.650073  | 0.305723  |
| H | 4.627781  | 0.357108  | 0.558197  |
| H | -3.213608 | 2.640727  | 0.495715  |
| H | 3.391214  | 2.420766  | 0.725122  |
| H | 1.352653  | 3.764161  | 0.643475  |
| H | -1.090948 | 3.846812  | 0.557026  |
| H | -0.321553 | -1.348437 | 3.504208  |
| H | -1.736094 | -1.264572 | 2.288926  |

#### 4Pc (isomer 2)

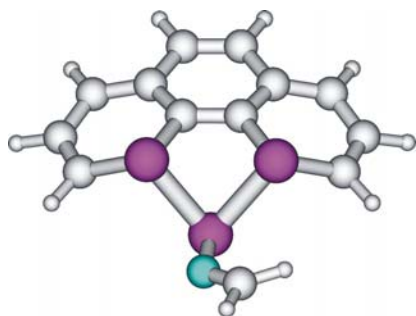

E=-1580.3597356

|   |           |           |           |
|---|-----------|-----------|-----------|
| C | 1.011731  | -0.342810 | -0.366049 |
| C | 0.450865  | 0.918361  | -0.356907 |
| C | 1.249145  | 2.085652  | -0.082704 |
| C | 2.677450  | 1.892024  | -0.022894 |
| C | 3.226476  | 0.651030  | -0.021369 |
| C | 2.410195  | -0.536484 | -0.086070 |
| P | -1.358551 | 1.019724  | -0.616102 |
| P | -1.681133 | -0.807601 | 0.829287  |
| P | -0.127703 | -1.746503 | -0.660919 |
| C | 0.799770  | -3.049061 | 0.141967  |
| C | 2.143704  | -2.957646 | 0.379758  |
| C | 2.931342  | -1.785001 | 0.219207  |
| C | 0.678792  | 3.311075  | 0.227894  |
| C | -0.715779 | 3.524106  | 0.397394  |
| C | -1.689403 | 2.589980  | 0.171505  |
| N | -3.072938 | -1.595855 | 0.294129  |
| C | -4.147950 | -1.138167 | -0.200976 |
| H | -2.730037 | 2.861389  | 0.315620  |
| H | 0.293468  | -3.997939 | 0.282911  |
| H | -1.022629 | 4.509589  | 0.737890  |
| H | 2.661039  | -3.849724 | 0.723518  |
| H | 1.344258  | 4.141988  | 0.437472  |
| H | 3.992149  | -1.855643 | 0.434918  |
| H | 4.299306  | 0.528886  | 0.087344  |
| H | 3.308152  | 2.768591  | 0.084279  |
| H | -4.952845 | -1.826378 | -0.462853 |
| H | -4.329523 | -0.072435 | -0.388542 |

### 5Pa ( $C_s$ )

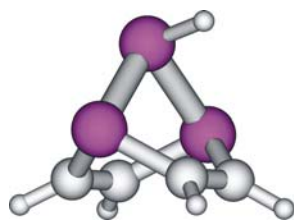

E=-1179.554597

|   |           |           |           |
|---|-----------|-----------|-----------|
| H | -1.420656 | -1.234957 | -1.453393 |
| P | -1.242764 | -1.080318 | -0.047093 |
| P | 1.024171  | -1.174999 | -0.024099 |
| P | -1.021027 | 1.177732  | -0.024099 |
| C | 1.231704  | 0.188649  | -1.289122 |
| C | 0.358233  | 1.193462  | -1.289122 |
| C | 0.963278  | -0.046274 | 1.474138  |
| C | 0.088239  | 0.960344  | 1.474138  |
| H | 2.083494  | 0.141278  | -1.961799 |
| H | 0.429869  | 2.043556  | -1.961799 |
| H | 1.651933  | -0.231230 | 2.293074  |
| H | 0.000925  | 1.668037  | 2.293074  |

### 5Pb

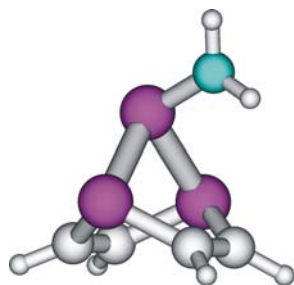

E=-1234.9453599

|   |           |           |           |
|---|-----------|-----------|-----------|
| C | 0.397494  | 0.668562  | 1.647985  |
| P | 0.261532  | 1.575115  | 0.027864  |
| P | -1.101411 | -0.021045 | -0.915245 |
| N | -2.483146 | -0.007571 | 0.060564  |
| C | 0.430418  | -0.666307 | 1.644154  |
| P | 0.337307  | -1.572217 | 0.021833  |
| C | 1.677127  | -0.634335 | -0.855655 |
| C | 1.646430  | 0.705360  | -0.851340 |
| H | 0.493601  | 1.254632  | 2.558384  |
| H | 0.553301  | -1.250942 | 2.552290  |
| H | 2.379008  | 1.305311  | -1.383494 |
| H | 2.435231  | -1.196148 | -1.393793 |
| H | -3.385836 | -0.171535 | -0.355558 |
| H | -2.463515 | -0.055792 | 1.070592  |

### 5Pc

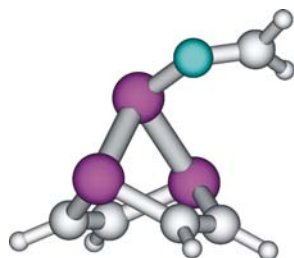

E=-1273.023816

|   |           |           |           |
|---|-----------|-----------|-----------|
| C | -1.630831 | -0.544332 | -0.758744 |
| C | -1.640564 | -0.564194 | 0.574474  |
| P | -0.027333 | -0.540519 | 1.504337  |
| C | 0.803380  | -1.924905 | 0.575542  |
| C | 0.800559  | -1.908101 | -0.762354 |
| P | -0.000360 | -0.477649 | -1.652225 |
| P | 1.010759  | 0.817358  | -0.063829 |
| N | 0.131401  | 2.268741  | -0.218276 |
| C | -0.553345 | 2.877990  | 0.656315  |
| H | 1.274856  | -2.684059 | -1.356119 |
| H | 1.287588  | -2.711202 | 1.147353  |
| H | -2.538466 | -0.592877 | -1.354156 |
| H | -2.558916 | -0.633501 | 1.151427  |
| H | -1.003740 | 3.840839  | 0.407961  |
| H | -0.728865 | 2.500868  | 1.672578  |

### 5Pd

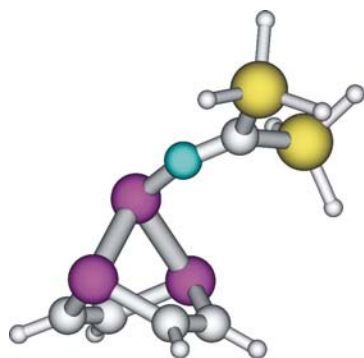

E=-1854.4582427

|   |           |           |           |
|---|-----------|-----------|-----------|
| C | 1.526328  | -0.767430 | 1.668245  |
| C | 1.356109  | 0.555557  | 1.680844  |
| P | 1.453467  | 1.513588  | 0.092071  |
| P | 0.488728  | -0.219357 | -1.151954 |
| N | -1.026500 | -0.653492 | -0.573589 |
| C | -2.114484 | -0.095201 | -0.187630 |
| i | -3.579352 | -1.277041 | 0.152027  |

|   |           |           |           |
|---|-----------|-----------|-----------|
| P | 1.844731  | -1.627138 | 0.052110  |
| C | 3.229884  | -0.527323 | -0.522652 |
| C | 3.054039  | 0.800570  | -0.523292 |
| i | -2.371331 | 1.803281  | 0.004021  |
| H | 4.137938  | -0.993522 | -0.893683 |
| H | 3.806984  | 1.486128  | -0.901588 |
| H | 1.513033  | -1.369942 | 2.572419  |
| H | 1.189222  | 1.114847  | 2.597670  |
| H | -1.819096 | 2.500132  | -1.184765 |
| H | -3.831314 | 2.056224  | 0.107488  |
| H | -1.706790 | 2.304384  | 1.233310  |
| H | -4.178070 | -0.944873 | 1.473542  |
| H | -4.626509 | -1.069555 | -0.884534 |
| H | -3.105480 | -2.680153 | 0.134092  |

**6Pa** (isomer 1,  $C_s$ )

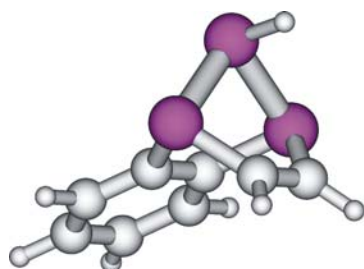

E=-1333.2526551

|   |           |           |           |
|---|-----------|-----------|-----------|
| P | -1.456193 | -1.694378 | 0.000000  |
| H | -1.047038 | -3.059617 | 0.000000  |
| P | 0.013573  | -0.964264 | 1.561909  |
| P | 0.013573  | -0.964264 | -1.561909 |
| C | -0.004474 | 0.700028  | 0.703988  |
| C | -0.004474 | 0.700028  | -0.703988 |
| C | -0.012600 | 1.906416  | 1.399314  |
| C | -0.012600 | 1.906416  | -1.399314 |
| C | -0.018299 | 3.115053  | 0.695561  |
| C | -0.018299 | 3.115053  | -0.695561 |
| C | 1.519806  | -1.612058 | 0.666296  |
| C | 1.519806  | -1.612058 | -0.666296 |
| H | -0.018826 | 1.910555  | 2.483907  |
| H | -0.018826 | 1.910555  | -2.483907 |
| H | -0.025519 | 4.053639  | 1.238431  |
| H | -0.025519 | 4.053639  | -1.238431 |
| H | 2.379123  | -1.919235 | 1.256524  |
| H | 2.379123  | -1.919235 | -1.256524 |

**6Pa** (isomer 2,  $C_s$ )

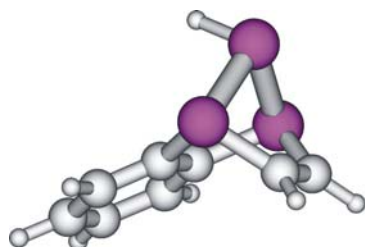

E=-1333.2534982

|   |           |           |           |
|---|-----------|-----------|-----------|
| P | -1.286019 | -1.956324 | 0.000000  |
| H | -2.356899 | -1.014807 | 0.000000  |
| P | -0.002285 | -0.934353 | 1.563145  |
| P | -0.002285 | -0.934353 | -1.563145 |
| C | -0.016365 | 0.722052  | 0.702848  |
| C | -0.016365 | 0.722052  | -0.702848 |
| C | -0.021271 | 1.927334  | 1.398740  |
| C | -0.021271 | 1.927334  | -1.398740 |
| C | -0.032407 | 3.137698  | 0.695083  |
| C | -0.032407 | 3.137698  | -0.695083 |
| C | 1.499309  | -1.599880 | 0.667694  |
| C | 1.499309  | -1.599880 | -0.667694 |
| H | 2.350098  | -1.936084 | 1.253575  |
| H | 2.350098  | -1.936084 | -1.253575 |
| H | -0.022727 | 1.932066  | 2.483547  |
| H | -0.022727 | 1.932066  | -2.483547 |
| H | -0.045090 | 4.075929  | 1.238472  |
| H | -0.045090 | 4.075929  | -1.238472 |

**6Pb** (isomer 1)

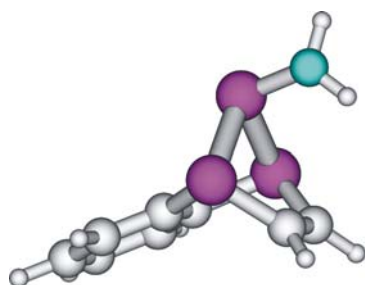

E=-1388.6402241

|   |           |           |           |
|---|-----------|-----------|-----------|
| C | 3.365709  | 0.677273  | -0.278280 |
| C | 3.356075  | -0.716371 | -0.258748 |
| C | 2.154099  | -1.407459 | -0.102976 |
| C | 0.958161  | -0.702769 | 0.047271  |
| C | 0.967972  | 0.706573  | 0.030349  |
| C | 2.174005  | 1.389501  | -0.140331 |
| P | -0.685977 | -1.560073 | 0.215727  |

|   |           |           |           |
|---|-----------|-----------|-----------|
| P | -1.519091 | -0.008835 | -1.236135 |
| N | -3.191833 | -0.085822 | -0.927579 |
| P | -0.663672 | 1.587567  | 0.186611  |
| C | -1.241315 | 0.700316  | 1.718479  |
| C | -1.253797 | -0.635399 | 1.731431  |
| H | 2.184073  | 2.473852  | -0.163243 |
| H | 2.148463  | -2.492094 | -0.098420 |
| H | 4.301372  | 1.211480  | -0.401060 |
| H | 4.284101  | -1.266869 | -0.366370 |
| H | -1.509969 | 1.292858  | 2.589593  |
| H | -1.529796 | -1.208048 | 2.613430  |
| H | -3.815909 | 0.215354  | -1.660422 |
| H | -3.573867 | 0.024348  | 0.003322  |

**6Pb (isomer 2)**

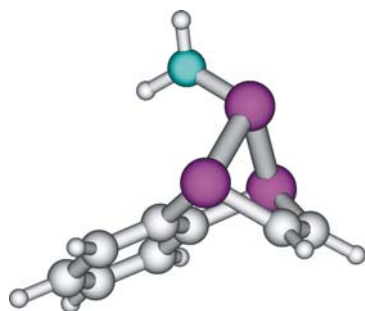

E=-1388.6427661

|   |           |           |           |
|---|-----------|-----------|-----------|
| C | 3.217547  | 0.654396  | 0.249181  |
| C | 2.018061  | 1.373202  | 0.251908  |
| C | 0.812841  | 0.720889  | -0.007941 |
| C | 0.808808  | -0.659918 | -0.278139 |
| C | 2.009067  | -1.369991 | -0.286725 |
| C | 3.213155  | -0.711092 | -0.019336 |
| P | -0.830008 | -1.477824 | -0.609532 |
| C | -1.428804 | -0.297740 | -1.907166 |
| C | -1.426388 | 1.018319  | -1.648373 |
| P | -0.817750 | 1.615609  | -0.003567 |
| P | -1.951049 | -0.176549 | 0.904525  |
| N | -1.174244 | -0.541506 | 2.370282  |
| H | -1.801084 | -0.700211 | -2.845345 |
| H | -1.799835 | 1.746805  | -2.363045 |
| H | 2.009661  | -2.434335 | -0.496489 |
| H | 2.026198  | 2.438126  | 0.458680  |
| H | 4.143536  | -1.268077 | -0.018212 |
| H | 4.151442  | 1.163854  | 0.459337  |
| H | -0.172014 | -0.479629 | 2.495451  |
| H | -1.701813 | -0.462940 | 3.225807  |



**6Pc (isomer 1)**

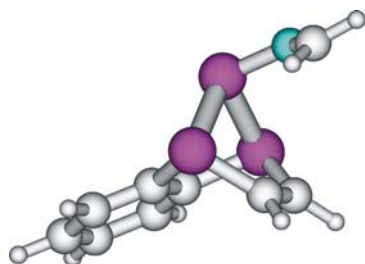

E=-1426.719649

|   |           |           |           |
|---|-----------|-----------|-----------|
| C | -0.002045 | 0.002134  | 0.012380  |
| C | 0.013051  | 0.022527  | 1.408254  |
| C | 1.224449  | 0.022422  | 2.096083  |
| C | 2.430676  | -0.000895 | 1.394052  |
| C | 2.424264  | -0.033798 | -0.001112 |
| C | 1.198979  | -0.029819 | -0.696707 |
| P | 3.997028  | -0.063218 | -1.002013 |
| C | 3.539182  | -1.510460 | -2.080426 |
| C | 2.377720  | -1.496790 | -2.736866 |
| P | 1.252090  | -0.025327 | -2.562601 |
| P | 2.948108  | 1.478755  | -2.362555 |
| N | 3.632303  | 1.388204  | -3.928620 |
| C | 4.817370  | 1.062730  | -4.237290 |
| H | 2.039600  | -2.332105 | -3.344514 |
| H | 4.214673  | -2.361614 | -2.110811 |
| H | -0.946836 | 0.013662  | -0.520117 |
| H | 3.372228  | 0.004432  | 1.932302  |
| H | -0.922219 | 0.041139  | 1.956556  |
| H | 1.232754  | 0.040066  | 3.180218  |
| H | 5.130956  | 1.119837  | -5.281421 |
| H | 5.571808  | 0.722316  | -3.515671 |

**6Pc (isomer 2)**

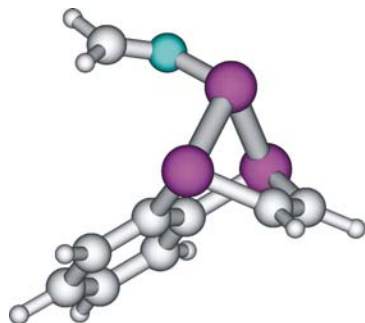

E=-1426.7215332

|   |           |           |           |
|---|-----------|-----------|-----------|
| C | -0.874752 | -0.429586 | -0.642118 |
| C | -2.073471 | -0.406984 | -1.352307 |

|   |           |           |           |
|---|-----------|-----------|-----------|
| C | -3.254927 | -0.014132 | -0.715536 |
| C | -3.236883 | 0.348334  | 0.627408  |
| C | -2.037089 | 0.323332  | 1.345553  |
| C | -0.854981 | -0.059926 | 0.713894  |
| P | 0.770004  | -0.111454 | 1.619055  |
| P | 1.992064  | 0.527363  | -0.236723 |
| N | 1.380193  | 2.013763  | -0.818874 |
| C | 0.885006  | 2.971582  | -0.153108 |
| P | 0.728327  | -0.943304 | -1.430859 |
| C | 1.214129  | -2.200779 | -0.148047 |
| C | 1.248501  | -1.843270 | 1.142404  |
| H | 1.478803  | -3.201915 | -0.477057 |
| H | 1.548885  | -2.533213 | 1.926214  |
| H | -2.091142 | -0.688600 | -2.399712 |
| H | -2.028572 | 0.604468  | 2.393370  |
| H | -4.184818 | 0.010093  | -1.272658 |
| H | -4.153112 | 0.653975  | 1.120271  |
| H | 0.603865  | 3.890884  | -0.670400 |
| H | 0.715622  | 2.947470  | 0.931150  |

**6Pd** (isomer 1)

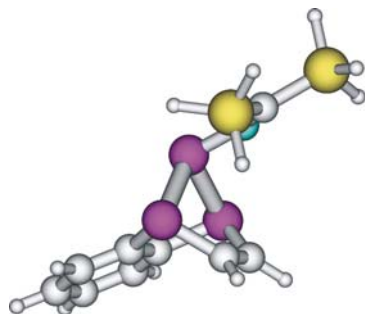

E=-2008.1535020

|    |           |           |           |
|----|-----------|-----------|-----------|
| C  | -0.040081 | 0.001475  | 0.049015  |
| C  | 0.004066  | -0.034983 | 1.443227  |
| C  | 1.235233  | -0.056540 | 2.101382  |
| C  | 2.429863  | -0.024252 | 1.354436  |
| C  | 2.376083  | 0.023568  | -0.039154 |
| C  | 1.141209  | 0.028568  | -0.689573 |
| P  | 1.362682  | -0.095597 | 3.958647  |
| P  | 3.032326  | 1.494927  | 3.694931  |
| N  | 4.124875  | 1.476787  | 4.991229  |
| C  | 4.035617  | 1.449647  | 6.271112  |
| Si | 2.410178  | 1.276810  | 7.289598  |
| P  | 4.043319  | 0.014177  | 2.287447  |
| C  | 3.695749  | -1.467230 | 3.357415  |
| C  | 2.565082  | -1.510077 | 4.064671  |
| Si | 5.688739  | 1.670251  | 7.208199  |
| H  | -0.917250 | -0.049857 | 2.015296  |
| H  | 3.293505  | 0.057203  | -0.616706 |

|   |           |           |           |
|---|-----------|-----------|-----------|
| H | -0.997904 | 0.008169  | -0.459195 |
| H | 1.103228  | 0.056354  | -1.772844 |
| H | 2.292349  | -2.366058 | 4.676654  |
| H | 4.411655  | -2.284949 | 3.349407  |
| H | 1.362277  | 2.159204  | 6.718311  |
| H | 1.936272  | -0.130018 | 7.297390  |
| H | 2.712361  | 1.689253  | 8.684409  |
| H | 5.803807  | 0.613956  | 8.250773  |
| H | 6.820454  | 1.585241  | 6.256702  |
| H | 5.689308  | 2.988375  | 7.898926  |

**6Pd** (isomer 2)

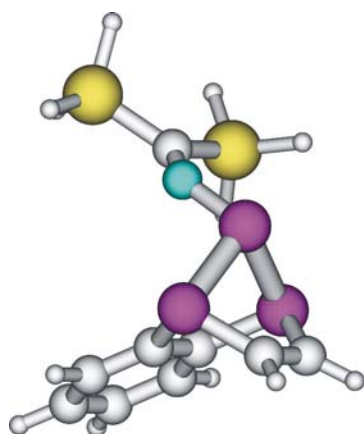

E=-2008.1556394

|    |           |           |           |
|----|-----------|-----------|-----------|
| C  | 1.733653  | 2.968843  | 0.997541  |
| C  | 1.961366  | 3.079412  | -0.370541 |
| C  | 1.889137  | 1.947086  | -1.187724 |
| C  | 1.582818  | 0.706224  | -0.631842 |
| C  | 1.350246  | 0.594396  | 0.749991  |
| C  | 1.430497  | 1.725485  | 1.560859  |
| P  | 1.475993  | -0.833903 | -1.665364 |
| C  | 2.608702  | -1.877530 | -0.628402 |
| C  | 2.373498  | -1.997624 | 0.685859  |
| P  | 0.950730  | -1.082461 | 1.446797  |
| P  | -0.226151 | -1.745564 | -0.446356 |
| N  | -1.481995 | -0.672798 | -0.809106 |
| C  | -2.451308 | -0.117082 | -0.178384 |
| Si | -3.689249 | 0.852113  | -1.267960 |
| Si | -2.776213 | -0.248531 | 1.714833  |
| H  | 2.066611  | 2.037275  | -2.254036 |
| H  | 1.254490  | 1.644398  | 2.628197  |
| H  | 2.191955  | 4.044826  | -0.806993 |
| H  | 1.787804  | 3.847715  | 1.630338  |
| H  | 3.424240  | -2.402694 | -1.117884 |
| H  | 2.982579  | -2.629435 | 1.326710  |
| H  | -2.576370 | -1.652133 | 2.155985  |
| H  | -1.870929 | 0.651410  | 2.471749  |

|   |           |          |           |
|---|-----------|----------|-----------|
| H | -4.182444 | 0.162454 | 1.961165  |
| H | -3.938330 | 2.186414 | -0.657494 |
| H | -3.143651 | 1.000688 | -2.636768 |
| H | -4.985772 | 0.122195 | -1.303745 |

**7Pa (C<sub>s</sub>)**

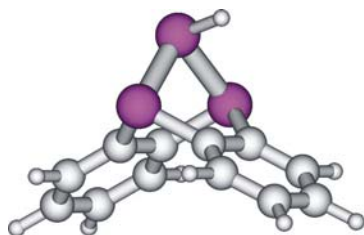

E=-1486.9509287

|   |           |           |           |
|---|-----------|-----------|-----------|
| P | 2.461080  | -0.200472 | 0.000000  |
| H | 2.514211  | -1.624583 | 0.000000  |
| P | 0.827504  | 0.011654  | 1.554390  |
| P | 0.827504  | 0.011654  | -1.554390 |
| C | -0.032545 | 1.417507  | 0.684786  |
| C | -0.032545 | 1.417507  | -0.684786 |
| C | -0.681783 | 2.438230  | 1.374384  |
| C | -0.681783 | 2.438230  | -1.374384 |
| C | -1.316037 | 3.465004  | 0.666056  |
| C | -1.316037 | 3.465004  | -0.666056 |
| H | -0.692097 | 2.443361  | 2.459154  |
| H | -0.692097 | 2.443361  | -2.459154 |
| H | -1.810716 | 4.265135  | 1.205363  |
| H | -1.810716 | 4.265135  | -1.205363 |
| C | -0.108161 | -1.352169 | 0.688051  |
| C | -0.108161 | -1.352169 | -0.688051 |
| C | -0.813658 | -2.335667 | 1.378228  |
| C | -0.813658 | -2.335667 | -1.378228 |
| H | -0.821340 | -2.340303 | 2.462841  |
| H | -0.821340 | -2.340303 | -2.462841 |
| C | -1.506794 | -3.322401 | 0.671270  |
| C | -1.506794 | -3.322401 | -0.671270 |
| H | -2.049751 | -4.090193 | 1.211111  |
| H | -2.049751 | -4.090193 | -1.211111 |

## 7Pb

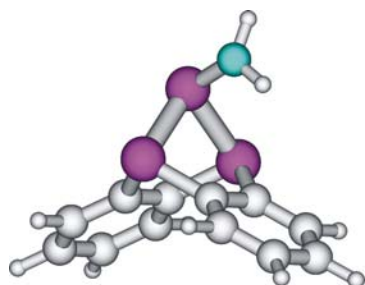

E=-1542.3377406

|   |           |           |           |
|---|-----------|-----------|-----------|
| C | 2.237475  | -1.131307 | 1.409376  |
| C | 1.279503  | -0.404242 | 0.703673  |
| C | 1.275083  | -0.431586 | -0.704641 |
| C | 2.231190  | -1.185117 | -1.385374 |
| C | 3.193011  | -1.906867 | -0.671561 |
| C | 3.195942  | -1.880424 | 0.719718  |
| P | -0.020389 | 0.618985  | 1.558571  |
| P | -0.004484 | 2.246796  | -0.034439 |
| N | 1.610637  | 2.793034  | 0.047034  |
| P | -0.027520 | 0.557046  | -1.592600 |
| C | -1.496793 | -0.150338 | -0.706295 |
| C | -2.599562 | -0.673279 | -1.385559 |
| C | -3.685752 | -1.178743 | -0.671062 |
| C | -3.679612 | -1.156275 | 0.722532  |
| C | -2.587814 | -0.626422 | 1.410489  |
| C | -1.492079 | -0.124727 | 0.704710  |
| H | 2.243339  | -1.112977 | 2.494015  |
| H | 2.231030  | -1.210712 | -2.469924 |
| H | 3.945026  | -2.436622 | 1.272322  |
| H | 3.939375  | -2.484407 | -1.205689 |
| H | -2.589940 | -0.603561 | 2.494937  |
| H | -2.609999 | -0.687787 | -2.470085 |
| H | -4.525697 | -1.549534 | 1.275127  |
| H | -4.536746 | -1.589423 | -1.203116 |
| H | 2.392081  | 2.157875  | -0.060465 |
| H | 1.799419  | 3.719472  | -0.305397 |

## 7Pc

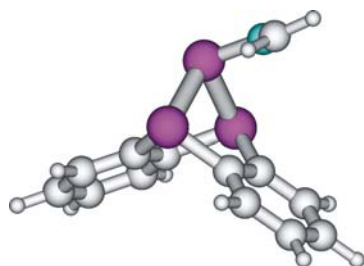

E=-1580.4173272

|   |           |           |           |
|---|-----------|-----------|-----------|
| C | 1.954590  | -1.461424 | 1.437856  |
| C | 1.102578  | -0.644625 | 0.695851  |
| C | 1.060418  | -0.767673 | -0.705129 |
| C | 1.872500  | -1.701659 | -1.345425 |
| C | 2.730097  | -2.512933 | -0.595950 |
| C | 2.770673  | -2.393594 | 0.789470  |
| P | -0.009967 | 0.608168  | 1.503314  |
| P | 0.135989  | 2.101734  | -0.245005 |
| N | 1.789588  | 2.471571  | -0.511866 |
| P | -0.105934 | 0.331999  | -1.645503 |
| C | -1.637694 | -0.101764 | -0.679742 |
| C | -2.811034 | -0.529517 | -1.302498 |
| C | -3.941069 | -0.822807 | -0.537605 |
| C | -3.904746 | -0.682843 | 0.848005  |
| C | -2.737301 | -0.251934 | 1.479757  |
| C | -1.599542 | 0.036036  | 0.723933  |
| H | 1.987539  | -1.374188 | 2.518784  |
| H | 1.844804  | -1.797186 | -2.425611 |
| H | 3.438294  | -3.020781 | 1.369799  |
| H | 3.367093  | -3.232390 | -1.098290 |
| H | -2.713943 | -0.141021 | 2.558404  |
| H | -2.846002 | -0.630718 | -2.381835 |
| H | -4.785342 | -0.908080 | 1.439283  |
| H | -4.849953 | -1.156851 | -1.025549 |
| C | 2.712989  | 2.533297  | 0.353982  |
| H | 3.709374  | 2.856028  | 0.045620  |
| H | 2.584951  | 2.284305  | 1.415339  |

## 7Pd

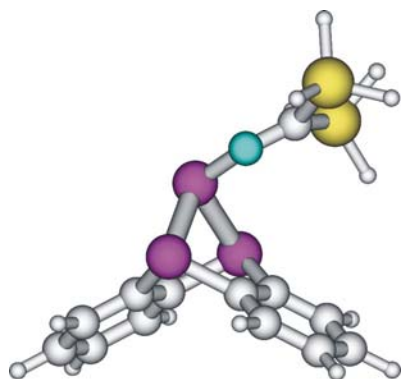

E=-2161.8511191

|   |           |           |           |
|---|-----------|-----------|-----------|
| C | -3.659954 | -0.462309 | -1.365018 |
| C | -2.402248 | -0.357113 | -0.768907 |
| C | -2.238579 | -0.713592 | 0.586607  |
| C | -3.334204 | -1.172664 | 1.320578  |
| C | -4.588778 | -1.266261 | 0.717210  |
| C | -4.751478 | -0.910879 | -0.620231 |
| P | -0.542647 | -0.564034 | 1.332369  |
| P | 0.248248  | -1.446584 | -0.650980 |
| N | 1.845759  | -0.926532 | -0.942094 |
| C | 2.924947  | -0.923685 | -0.246736 |
| i | 4.499344  | -0.400841 | -1.199789 |
| P | -0.901478 | 0.199902  | -1.715851 |
| C | -0.384436 | 1.535722  | -0.532828 |
| C | -0.224822 | 1.194875  | 0.822818  |
| C | 0.149588  | 2.171368  | 1.744375  |
| C | 0.372829  | 3.484733  | 1.319634  |
| C | 0.216363  | 3.821092  | -0.021176 |
| C | -0.165504 | 2.847421  | -0.949362 |
| i | 3.100004  | -1.461225 | 1.594582  |
| H | -3.789095 | -0.196374 | -2.408598 |
| H | -0.285410 | 3.114024  | -1.993993 |
| H | -5.727598 | -0.985312 | -1.086495 |
| H | 0.394914  | 4.838570  | -0.350745 |
| H | -5.438117 | -1.617770 | 1.292376  |
| H | 0.672802  | 4.239469  | 2.038063  |
| H | -3.210191 | -1.454484 | 2.360552  |
| H | 0.271406  | 1.914240  | 2.791194  |
| H | 4.535226  | -1.762956 | 1.833283  |
| H | 2.681379  | -0.370685 | 2.510240  |
| H | 2.282915  | -2.674984 | 1.845677  |
| H | 5.264767  | 0.578581  | -0.380714 |
| H | 5.366659  | -1.592904 | -1.404620 |
| H | 4.124985  | 0.193712  | -2.503508 |

## P-ligands

### 1P (isomer 2)

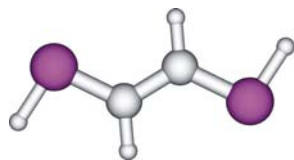

E=-761.3394349

|   |           |           |          |
|---|-----------|-----------|----------|
| C | -0.336534 | 0.632195  | 0.000000 |
| C | 0.336534  | -0.632195 | 0.000000 |
| H | -1.425131 | 0.593890  | 0.000000 |
| H | 1.425131  | -0.593890 | 0.000000 |
| P | 0.336534  | 2.191573  | 0.000000 |
| P | -0.336534 | -2.191573 | 0.000000 |
| H | 1.709807  | 1.788849  | 0.000000 |
| H | -1.709807 | -1.788849 | 0.000000 |

### 2P

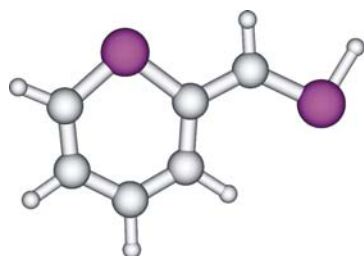

E=-915.0229376

|   |           |           |          |
|---|-----------|-----------|----------|
| C | 0.000000  | 0.286712  | 0.000000 |
| P | -1.758307 | 0.130170  | 0.000000 |
| C | -1.947331 | -1.600828 | 0.000000 |
| C | -0.909440 | -2.521046 | 0.000000 |
| C | 0.439185  | -2.144761 | 0.000000 |
| C | 0.861985  | -0.824055 | 0.000000 |
| C | 0.508575  | 1.654887  | 0.000000 |
| P | 2.135855  | 2.139870  | 0.000000 |
| H | 1.871544  | 3.541153  | 0.000000 |
| H | -0.263537 | 2.420624  | 0.000000 |
| H | 1.933111  | -0.639243 | 0.000000 |
| H | 1.192651  | -2.924871 | 0.000000 |
| H | -1.146909 | -3.581019 | 0.000000 |
| H | -2.967914 | -1.972696 | 0.000000 |



### 3P ( $C_2$ )

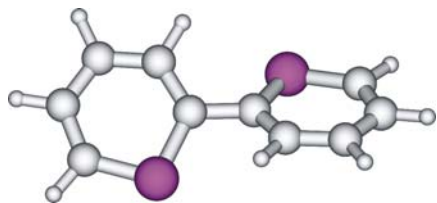

E=-1068.708966

|   |           |           |           |
|---|-----------|-----------|-----------|
| C | -0.022971 | 0.743119  | 0.095826  |
| C | 0.022971  | -0.743119 | 0.095826  |
| P | -1.483566 | 1.516566  | -0.526697 |
| P | 1.483566  | -1.516566 | -0.526697 |
| C | -1.080797 | 3.197670  | -0.333516 |
| C | 1.080797  | -3.197670 | -0.333516 |
| C | 0.117805  | 3.692921  | 0.165261  |
| C | -0.117805 | -3.692921 | 0.165261  |
| C | 1.154210  | 2.862442  | 0.589058  |
| C | -1.154210 | -2.862442 | 0.589058  |
| C | 1.080797  | 1.471412  | 0.553363  |
| C | -1.080797 | -1.471412 | 0.553363  |
| H | 1.935142  | 0.913197  | 0.926584  |
| H | -1.935142 | -0.913197 | 0.926584  |
| H | 2.060410  | 3.316558  | 0.974925  |
| H | -2.060410 | -3.316558 | 0.974925  |
| H | 0.257264  | 4.768241  | 0.229536  |
| H | -0.257264 | -4.768241 | 0.229536  |
| H | -1.840210 | 3.907057  | -0.650550 |
| H | 1.840210  | -3.907057 | -0.650550 |

### 4P ( $C_s$ )

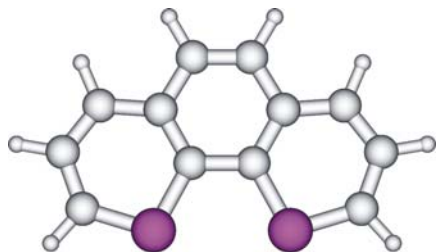

E=-1144.9508053

|   |          |           |           |
|---|----------|-----------|-----------|
| C | 0.000000 | 0.730222  | -0.112897 |
| C | 0.000000 | -0.730222 | -0.112897 |
| C | 0.000000 | 1.427291  | 1.128925  |
| C | 0.000000 | -1.427291 | 1.128925  |

|   |          |           |           |
|---|----------|-----------|-----------|
| C | 0.000000 | 0.677331  | 2.352178  |
| C | 0.000000 | -0.677331 | 2.352178  |
| P | 0.000000 | 1.590096  | -1.680878 |
| P | 0.000000 | -1.590096 | -1.680878 |
| C | 0.000000 | 3.235839  | -1.178609 |
| C | 0.000000 | -3.235839 | -1.178609 |
| C | 0.000000 | 3.696534  | 0.144769  |
| C | 0.000000 | -3.696534 | 0.144769  |
| C | 0.000000 | 2.841678  | 1.224074  |
| C | 0.000000 | -2.841678 | 1.224074  |
| H | 0.000000 | 3.970984  | -1.978383 |
| H | 0.000000 | -3.970984 | -1.978383 |
| H | 0.000000 | 4.766839  | 0.328902  |
| H | 0.000000 | -4.766839 | 0.328902  |
| H | 0.000000 | 3.265942  | 2.223085  |
| H | 0.000000 | -3.265942 | 2.223085  |
| H | 0.000000 | 1.224839  | 3.288934  |
| H | 0.000000 | -1.224839 | 3.288934  |

**5P** ( $D_{2h}$ )

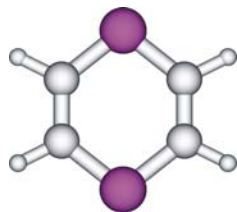

$E = -837.5962367$

|   |          |           |           |
|---|----------|-----------|-----------|
| P | 0.000000 | 0.000000  | 1.786323  |
| P | 0.000000 | 0.000000  | -1.786323 |
| C | 0.000000 | 1.361945  | 0.692862  |
| C | 0.000000 | -1.361945 | 0.692862  |
| C | 0.000000 | 1.361945  | -0.692862 |
| C | 0.000000 | -1.361945 | -0.692862 |
| H | 0.000000 | 2.331120  | 1.188908  |
| H | 0.000000 | -2.331120 | 1.188908  |
| H | 0.000000 | 2.331120  | -1.188908 |
| H | 0.000000 | -2.331120 | -1.188908 |

**6P** ( $C_{2v}$ )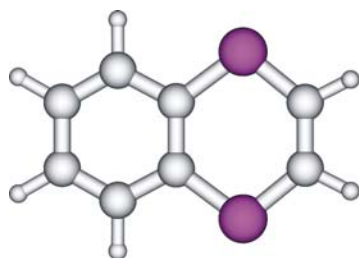

E=-991.2740414

|   |          |           |           |
|---|----------|-----------|-----------|
| P | 0.000000 | 1.786326  | -1.074682 |
| P | 0.000000 | -1.786326 | -1.074682 |
| C | 0.000000 | 0.714787  | 0.357667  |
| C | 0.000000 | 0.701597  | -2.407384 |
| C | 0.000000 | -0.714787 | 0.357667  |
| C | 0.000000 | -0.701597 | -2.407384 |
| C | 0.000000 | 1.390697  | 1.607045  |
| H | 0.000000 | 1.193188  | -3.378604 |
| C | 0.000000 | -1.390697 | 1.607045  |
| H | 0.000000 | -1.193188 | -3.378604 |
| C | 0.000000 | 0.703968  | 2.800847  |
| C | 0.000000 | -0.703968 | 2.800847  |
| H | 0.000000 | 2.476339  | 1.610188  |
| H | 0.000000 | -2.476339 | 1.610188  |
| H | 0.000000 | 1.246284  | 3.739587  |
| H | 0.000000 | -1.246284 | 3.739587  |

**7P** ( $D_{2h}$ )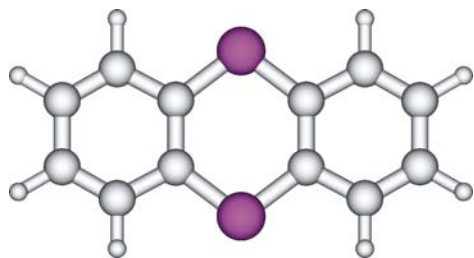

E=-1144.9446989

|   |          |           |           |
|---|----------|-----------|-----------|
| P | 0.000000 | 0.000000  | 1.781997  |
| P | 0.000000 | 0.000000  | -1.781997 |
| C | 0.000000 | 1.403549  | 0.718789  |
| C | 0.000000 | -1.403549 | 0.718789  |
| C | 0.000000 | 1.403549  | -0.718789 |
| C | 0.000000 | -1.403549 | -0.718789 |
| C | 0.000000 | 2.663863  | 1.394145  |
| C | 0.000000 | -2.663863 | 1.394145  |
| C | 0.000000 | 2.663863  | -1.394145 |

|   |          |           |           |
|---|----------|-----------|-----------|
| C | 0.000000 | -2.663863 | -1.394145 |
| C | 0.000000 | 3.850226  | 0.708384  |
| C | 0.000000 | 3.850226  | -0.708384 |
| C | 0.000000 | -3.850226 | 0.708384  |
| C | 0.000000 | -3.850226 | -0.708384 |
| H | 0.000000 | -2.667348 | 2.479617  |
| H | 0.000000 | 2.667348  | 2.479617  |
| H | 0.000000 | -2.667348 | -2.479617 |
| H | 0.000000 | 2.667348  | -2.479617 |
| H | 0.000000 | -4.790337 | 1.248196  |
| H | 0.000000 | -4.790337 | -1.248196 |
| H | 0.000000 | 4.790337  | 1.248196  |
| H | 0.000000 | 4.790337  | -1.248196 |
